# 1 **Dysfunctional TRPM8 signalling in the vascular** 2 **response to environmental cold in ageing.**

3  
4 **Dibesh Thapa<sup>1</sup>, João de Sousa Valente<sup>1</sup>, Brentton Barrett<sup>1</sup>, Fulye Argunhan<sup>1</sup>, Sheng Y.**  
5 **Lee<sup>1,2</sup>, Sofya Nikitochkina<sup>1</sup>, Xenia Kodji<sup>1,3</sup>, and Susan D. Brain<sup>1\*</sup>**

6  
7 <sup>1</sup>Section of Vascular Biology and Inflammation, School of Cardiovascular Medicine and Sciences, BHF  
8 Centre of Research Excellence, King's College London, Franklin-Wilkins Building, Waterloo Campus,  
9 King's College London, London SE1 9NH, UK.

10 <sup>2</sup>Cancer Research UK, Cambridge Institute, University of Cambridge, Cambridge, CB2 0RE, UK.

11 <sup>3</sup>Skin Research Institute, Agency of Science, Technology, and Research (A\*STAR), 8A Biomedical  
12 Grove, #06-21 Immunos, Singapore 138648.

13

## 14 **Corresponding author (\*):**

15 Professor Susan D. Brain  
16 Vascular Biology and Inflammation Section, School of Cardiovascular Medicine and Sciences,  
17 BHF Cardiovascular Centre of Excellence,  
18 King's College London,  
19 Franklin-Wilkins Building, London SE1 9NH, UK  
20 email: sue.brain@kcl.ac.uk  
21

22

23

24

25

26

27

28

29

30

31

32

33

34

35

36

37

## 38 Abstract

39 Ageing is associated with increased vulnerability to environmental cold exposure. Previously,  
40 we identified the role of the cold-sensitive transient receptor potential (TRP) A1, M8 receptors  
41 as vascular cold sensors in mouse skin. We hypothesised that this dynamic cold-sensor  
42 system may become dysfunctional in ageing. We show that behavioural and vascular  
43 responses to skin local environmental cooling are impaired with even moderate ageing, with  
44 reduced TRPM8 gene/protein expression especially. Pharmacological blockade of the  
45 residual TRPA1/TRPM8 component substantially diminished the response in aged, compared  
46 with young mice. This implies the reliance of the already reduced cold-induced vascular  
47 response in ageing mice on remaining TRP receptor activity. Moreover, sympathetic-induced  
48 vasoconstriction was reduced with downregulation of the  $\alpha_{2c}$  adrenoceptor receptor in ageing.  
49 The cold-induced vascular response is important for sensing cold and retaining body heat and  
50 health. These findings reveal that cold sensors, essential for this neurovascular pathway,  
51 decline as ageing onsets.

52

## 53 Introduction

54 Upon exposure to cold, depending on the type and intensity, several counterbalancing  
55 responses are produced, such as the behavioural response of shivering thermogenesis  
56 involving skeletal muscle, or biochemical responses such as non-shivering thermogenesis in  
57 brown adipose tissue (BAT) and peripheral vasoconstriction in skin (Señaris et al., 2018,  
58 Morrison, Shaun F., Nakamura, 2011, Morrison, S. F., Nakamura, 2019). To produce such  
59 responses, thermo-sensors in the form of temperature sensitive sensory receptors are  
60 distributed throughout the skin and are considered to work as a first line of defence against  
61 cold, which makes peripheral cutaneous responses a fundamental event in the defence  
62 against environmental thermal challenge. The sensory receptors in the skin initiate the  
63 vascular cold constrictor response which acts to protect against body heat loss and prevent  
64 hypothermia. This response is followed by the subsequent vasodilation, a restorative response  
65 that is essential to protect the affected skin against cold-induced conditions, such as chilblains,  
66 trench foot, frostbite, and Raynaud's condition (Daanen, van der Struijs, Norbert R., 2005,  
67 Keatinge, 1957, Lewis, 1930). It is a finely tuned well balanced response that maintains cellular  
68 function and physiological homeostasis during cold exposure. Whilst this response is relevant  
69 to all ages, physiological changes in ageing leads to dysfunctional signalling which causes a  
70 reduced adaptation to cold exposure (Guergova, Dufour, 2011). With the lack of physical  
71 activity in the elderly population, it exacerbates the fall in core body temperature which can  
72 cause fatal cardiovascular and respiratory problems (Billeter et al., 2014, Stares, Kosatsky,  
73 2015). This is normally the biggest cause behind the NHS excess winter deaths that we  
74 witness every year, where in 2018 it caused approximately 11,000 deaths linked to cold  
75 exposure in England (Office for National Statistics, 2019).

76 We have previously delineated the primary roles of transient receptor potential (TRP) channels  
77 in producing a distinctive biphasic vascular response to cold in the mouse paw consisting of a  
78 TRP ankyrin 1 (TRPA1)/ melastatin 8 (TRPM8)-initiated sympathetic  $\alpha_{2c}$  adrenoceptor  
79 mediated neuronal vasoconstriction and a distinct TRPA1-CGRP mediated sensory-  
80 vasodilator component (Aubdool et al., 2016). TRPA1 is a biomolecular sensor for noxious  
81 cold ( $<18^{\circ}\text{C}$ ), mediating aversive behaviour such as avoiding cold-induced pain, whilst also  
82 being involved in mediating inflammatory pain (Kwan et al., 2006, Nassini et al., 2014, Jain et  
83 al., 2011, Gouin et al., 2017). Additionally, it activates C and A $\delta$  sensory nerves to release  
84 neuropeptides such as CGRP to mediate neurogenic vasodilation (Aubdool et al., 2016, Story  
85 et al., 2003, Gentry et al., 2010). TRPM8 is sensitive to cool temperatures ( $<28^{\circ}\text{C}$ ) (McKemy,  
86 Neuhausser & Julius, 2002, Peier et al., 2002). It is involved in deep body cooling and  
87 suggested to supersede the role of TRPA1 (Gavva et al., 2012). TRPM8 is also suggested to

88 be a vasoactive stimulus (Bautista et al., 2007, Johnson et al., 2005, Silva et al., 2019). The  
89 other established receptor that plays a pivotal role in cold signalling is the sympathetic  $\alpha_{2c}$   
90 adrenoceptor, which mediates the vasoconstriction of the blood vessels (Bailey et al., 2004).  
91 Whilst the sympathetic branch that is involved in the vasoconstrictor component of the cold  
92 response has been shown to have reduced activity in ageing humans (Holowatz, Thompson-  
93 Torgerson & Kenney, 2010, Degroot, Kenney, 2007), little is known about the functionality of  
94 the cold receptors TRPA1 and TRPM8 in ageing. In the current study we hypothesize that  
95 signalling via the cold receptors TRPA1 and TRPM8 deteriorates with ageing which causes  
96 an impaired vascular response to the cold.

97 The primary objective of this study is to investigate the cutaneous vascular response to cold  
98 in ageing, focusing on the activity of cold TRP receptors; TRPA1 and TRPM8. As sympathetic-  
99 sensory neuronal signalling is key for the cutaneous vascular cold response in ageing, we also  
100 searched for evidence of dysfunction within these systems. Here using *in vivo*, *ex vivo*,  
101 genetic, and pharmacological approaches we show that TRPA1 and TRPM8 signalling  
102 declines with ageing which affects the sensing as well as functional pathways involved in cold  
103 signalling; all of which contribute to the impaired cold vascular response. Additionally, we  
104 provide evidence that the  $\alpha_{2c}$  adrenoceptor as well as the TRPM8 receptor both play critical  
105 roles to influence this outcome, as the expression of both diminishes significantly in ageing  
106 which impacts the vascular response to cold. These important findings establish the dynamic  
107 role of cold sensitive TRP receptors and sympathetic receptors in the cutaneous vascular  
108 response to the cold as ageing occurs.

109

## 110 Results

111 **Cold-induced vascular response is impaired in ageing.** We analysed the cold induced vascular  
112 response in WT CD1 females (Young: 2-3 months, Aged: 13-15 months) with full-field laser  
113 speckle imager (FLPI) using the cold water immersion model (Fig 1a) developed in our  
114 laboratory (Aubdool et al., 2014, Pan et al., 2018). After the baseline blood flow was measured  
115 for 5 min, the ipsilateral hindpaw was immersed in cold water at 4°C, a temperature that  
116 produces a robust vascular response, for 5 min and blood flow was then recorded for another  
117 30 min. The cold treatment produced a typical vascular response of rapid vasoconstriction  
118 followed by a prolonged recovery vasodilator response in both young and aged mice (Fig 1b-  
119 c, Supplementary Fig 1a). In young mice, the cold treatment produced a maximum  
120 vasoconstriction of  $51.1 \pm 1.176\%$ , however, in aged mice this was significantly blunted with  
121 maximum vasoconstriction of  $27.7 \pm 2.976\%$  (Fig 1d). These changes were reflected in the  
122 area under the response curve (AUC) analysis with a significantly greater response in young  
123 than aged mice (Fig 1e). The result was extended by measurement of the blood flow recovery  
124 after the cold treatment. Although blood flow did not fully recover back to the baseline, the  
125 initial rate of recovery immediately after maximum vasoconstriction before it slowly plateaued  
126 off was significantly faster in the young mice compared to the aged mice (Fig 1f). These results  
127 suggest that with ageing the cold induced vascular response starts to diminish, which affects  
128 both parts of the vascular response. We were surprised that these changes were observed  
129 with moderately aged mice, equivalent to middle aged in human terms (Dutta, Sengupta,  
130 2016). However, at this age there is a clear evidence of elevated gene expression in DRG and  
131 skin of senescence markers associated with ageing, p16 and p21, (Fig 1g-h) also confirmed  
132 by western blotting (Fig 1i).

133 To extend our mechanistic understanding, we also used a laser Doppler imager (VMS-LDF),  
134 in addition to FLPI, which simultaneously measures the blood flow, skin temperature and  
135 tissue oxygen saturation level at a single point, to investigate the vascular response to cold.  
136 Similar to the results obtained using the FLPI, the environmental cold water treatment  
137 produced an impaired vascular response in the paws of aged mice compared to the young

138 mice (Fig 2a). In young mice, the cold treatment produced a maximum vasoconstriction of  
139  $45.5 \pm 2.952\%$ , however in aged mice this was significantly lower with a maximum  
140 vasoconstriction of  $23.4 \pm 4.678\%$ , a result which was reflected in AUC analysis (Fig 2b-c).  
141 There was a trend of greater reduction in skin temperature of aged mice after the cold water  
142 treatment; however, the aged mice had a significantly higher skin temperature at baseline,  
143 suggesting they were losing more body heat and consistent with the fact that the ability to  
144 maintain core body temperature declines with ageing (Fig 2d-f). The tissue oxygen saturation  
145 level underwent a similar reduction in both young and aged mice after the cold exposure (Fig  
146 2g-h) but recovered more robustly in the young mice compared to the aged mice as shown by  
147 AUC analysis (Fig 2i). We also found evidence of increased cellular stress as protein  
148 expression of 3-nitrotyrosine, a biomarker of oxidative stress produced via reactive nitrogen  
149 species was elevated in aged hindpaw skin (Supplementary Fig 2), in keeping with  
150 physiological ageing. These results from two distinct techniques confirm our finding that the  
151 cold induced vascular response starts to diminish with ageing.

152

153 **Cold sensitivity is impaired in ageing.** To learn if cold sensitivity had altered with ageing, we  
154 examined the functionality of TRPA1 and TRPM8 channels in behavioural studies using a cold  
155 plate set at 4°C, 10°C, and 20°C, within the activation range of TRPA1 and TRPM8 receptors  
156 (Dhaka et al., 2007, Kwan et al., 2006). At all three cool/cold temperatures, the aged mice  
157 showed a significant delayed latency for paw licking/paw withdrawal/jumping compared to the  
158 young mice, suggesting impaired cold sensing in aged mice (Fig 3a-c), but with little difference  
159 in the total number of responses observed among groups (Fig d-f). When the test was  
160 performed at 30°C, a temperature outside the activation range of TRPA1 and TRPM8, we  
161 observed no delayed latency in response time, although the total number of responses was  
162 significantly lower in the aged mice (Fig 3g-h). These results indicate that there is a reduction  
163 in sensitivity to cold with ageing at temperatures at which the cold sensors TRPA1 and TRPM8  
164 are active; thus leading us to hypothesise that at least one cold-sensitive TRP pathway  
165 deteriorates with ageing. Of note, the largest difference in response time between young and  
166 aged mice was observed at 20°C, in keeping with the TRPM8 activation range (Fig 3i).

167

168 **The cold-induced vascular response remains dependent on TRPA1 but not TRPM8 in ageing.**  
169 To investigate the role of TRPA1 and TRPM8 in the local cold water immersion test; we  
170 measured the cold-induced vascular response in the presence of the TRPA1 antagonist  
171 A967079 (100 mg kg<sup>-1</sup> i.p.) and TRPM8 antagonist AMTB (10 mg kg<sup>-1</sup> i.p.), a combination  
172 previously shown by us to inhibit the cold induced vascular response (Pan et al., 2018). The  
173 combined pre-treatment of A967079 and AMTB partially but significantly inhibited the  
174 vasoconstriction in young mice. By comparison, this treatment regime produced a more  
175 substantial inhibition of vascular responses induced by cold in the aged mice (Fig 4a, 4d). This  
176 result reveals that the role of TRP receptors in the cold-induced vascular response remains  
177 and suggests as ageing occurs the TRP-mediated signalling may become more important.  
178 Next, we performed the cold water immersion test in the presence of either A967079 or AMTB.  
179 The A967079 treatment produced a similar effect to the combined antagonist treatment of  
180 A967079+AMTB, where the antagonist was more effective in aged than in the young mice (Fig  
181 4b, Fig 4e). By comparison, the AMTB treatment inhibited the response in young mice, but  
182 had no significant effect in the vascular response to cold (Fig 4c, 4f) in aged mice. This  
183 provides further evidence that as ageing occurs, TRPM8 loses its ability to respond to local  
184 cold treatment. Next, we examined the expression of TRPA1 and TRPM8 in DRGs of young  
185 and aged mice. RT-PCR analysis of DRG showed similar level of TRPA1 mRNA in both young  
186 and aged mice (Fig 4g). However, the level of TRPM8 mRNA was significantly reduced in the  
187 aged compared to the young mice (Fig 4h), as was its protein expression when analysed by  
188 western blot (Fig 4i).

189 **TRPA1 and TRPM8 vasodilator signalling is impaired in ageing.** Thus far we had gained  
190 multiple evidence that TRPM8 activity is impaired in vascular signalling in ageing, with some  
191 evidence for a reduction in TRPA1 activity. To build on these findings, we examined the  
192 vasoactive effect of TRPA1 and TRPM8 agonists that are commonly associated with sensory  
193 nerves. The topical application of cinnamaldehyde (CA) and menthol on mouse skin have  
194 previously been shown to mediate vasodilation via TRPA1 and TRPM8 channels respectively  
195 (Craighead et al., 2017, Aubdool et al., 2016). The topical application of menthol (10%) to the  
196 ear caused increased blood flow in young mice, which was significantly lower in the aged mice  
197 (Fig 5a), as shown by the maximum increase in blood flow (Fig 5b). The AUC analysis of blood  
198 flow showed significant increase with menthol treatment compared to vehicle in young mice  
199 but not in aged mice (Fig 5c). Similarly, cinnamaldehyde (CA, 10%) application also increased  
200 blood flow in young mice, however, this increase was significantly lower in aged mice (Fig 5d-  
201 e, Supplementary Fig 3a-b). The AUC analysis showed a significant increase in blood flow  
202 with CA treatment compared to vehicle in young mice but not in aged mice (Fig 5f). These  
203 findings suggest that the TRPA1 and TRPM8-mediated vasoactive activity starts to deteriorate  
204 in moderate ageing, and it is not exclusive to cold signalling. To build on this concept, we  
205 examined whether the activity of another prominent TRP receptor, TRPV1, is also impaired  
206 with ageing. To probe this, we studied capsaicin-induced increase in ear blood flow (Grant et  
207 al., 2005). The topical application of 10% capsaicin produced a similar increase in ear blood  
208 flow in both young and aged mice (Fig 5g-i) indicating, unlike the TRPA1 and TRPM8  
209 signalling, the TRPV1 signalling does not deteriorate with ageing.

210

211 **Dysfunction in sympathetic signalling contributes to impaired cold response in ageing.** In  
212 comparison to the sensory system, the importance of sympathetic nerves in mediating the  
213 vascular smooth muscle constriction in the cold response is well established (Bailey et al.,  
214 2004, Smith et al., 2004). To understand whether there is modulation of this pathway as ageing  
215 progresses, we examined the sympathetic-mediated vasoconstriction. The response to the  
216 intraplantar injection of the non-selective and endogenous sympathetic neurotransmitter  
217 noradrenaline (NA) revealed a significantly greater reduction of blood flow in young mice  
218 compared to aged mice (Fig 6a-b). Knowing that the  $\alpha_{2c}$  adrenoceptor is essential for cold  
219 induced vasoconstriction (Aubdool et al., 2014, Bailey et al., 2004, Honda et al., 2007), we  
220 then proceeded to investigate the effect of the selective  $\alpha_2$  adrenoceptor agonist  
221 medetomidine, in hindpaw blood flow. Medetomidine caused immediate vasoconstriction as  
222 expected, but the response was blunted in aged mice compared to young mice (Fig 6c-d).  
223 These results recapitulate previous findings that suggest a defect also in sympathetic  
224 signalling in aged mice involving the  $\alpha_{2c}$  adrenoceptor, in addition to the cold TRP receptors.  
225 The western blotting analysis of the hind paw skin showed a significant reduction in the  
226 expression of  $\alpha_{2c}$  adrenoceptor in aged mice (Fig 6e). To elucidate further potential defects in  
227 the sympathetic pathway with ageing, we investigated the biosynthesis pathway of NA, the  
228 major signalling molecule of sympathetic system. Tyrosine hydroxylase (TH), an enzyme that  
229 catalyses the rate limiting stage of noradrenaline synthesis, showed a similar level of  
230 expression (Fig 6f) including of its active form, phosphorylated TH in both young and aged  
231 mice (Supplementary Fig 4), suggesting the production of noradrenaline remained unaltered  
232 with ageing. This indicates that in ageing the expression and function of the  $\alpha_{2c}$  adrenoceptor  
233 diminishes and that contributes to the impaired constrictor response against cold.

234

235 **Sympathetic-sensory signalling and influence of ageing.** We extended our investigation of  
236 sympathetic system in vascular cold response by exploring potential crosstalk between  
237 sympathetic and sensory signalling in ageing. To elucidate this, we first investigated DRG and  
238 found that  $\alpha_{2a}$  and  $\alpha_{2c}$  adrenoceptor gene expression was reduced in ageing (Supplementary  
239 Fig 5a-b) similar to that shown for the TRPM8 gene, (Fig 4h) whilst no significant difference

240 was found for TRPV1 receptors (Supplementary Fig 5c) in keeping with results for TRPA1 (Fig  
241 4g). By comparison, whilst the TRP receptors are well known to be expressed in sensory  
242 neurons there is evidence for a broader localisation (Hirai et al., 2018, Jain et al., 2011, Smith  
243 et al., 2004, Yang et al., 2006). We investigated the possible expression of these receptors on  
244 sympathetic nerves by collecting the sympathetic ganglia from the cervical and thoracic  
245 paravertebral regions where they could directly influence the NA transmission that mediates  
246 the vasoconstrictor component of the vascular cold response. To confirm the phenotype of  
247 sympathetic neurons, we used positive markers such as tyrosine hydroxylase (TH) and  
248 dopamine  $\beta$ -hydroxylase (Supplementary Fig 6) both of which exhibited high expression  
249 compared to sensory neuron of DRGs and kidney which were used as negative controls. The  
250 RT-PCR data on sympathetic ganglia showed the gene expression of both TRPA1 and  
251 TRPM8 in young and aged mice. Interestingly, the expression of both receptors were  
252 significantly downregulated in aged mice (Fig 7a-b). Whilst there is no feasible selective  
253 TRPA1 antibody available, western blot analysis of TRPM8 on sympathetic ganglia  
254 recapitulated the qPCR finding of diminished expression in aged mice compared to young  
255 mice (Fig 7c). These findings reveal expression of cold TRP receptors in sympathetic neurons  
256 which are diminished in ageing.

257

258

259

260

261

262

263

264

265

266

267

268

269

270

271

272

273

274

275

276

277

278

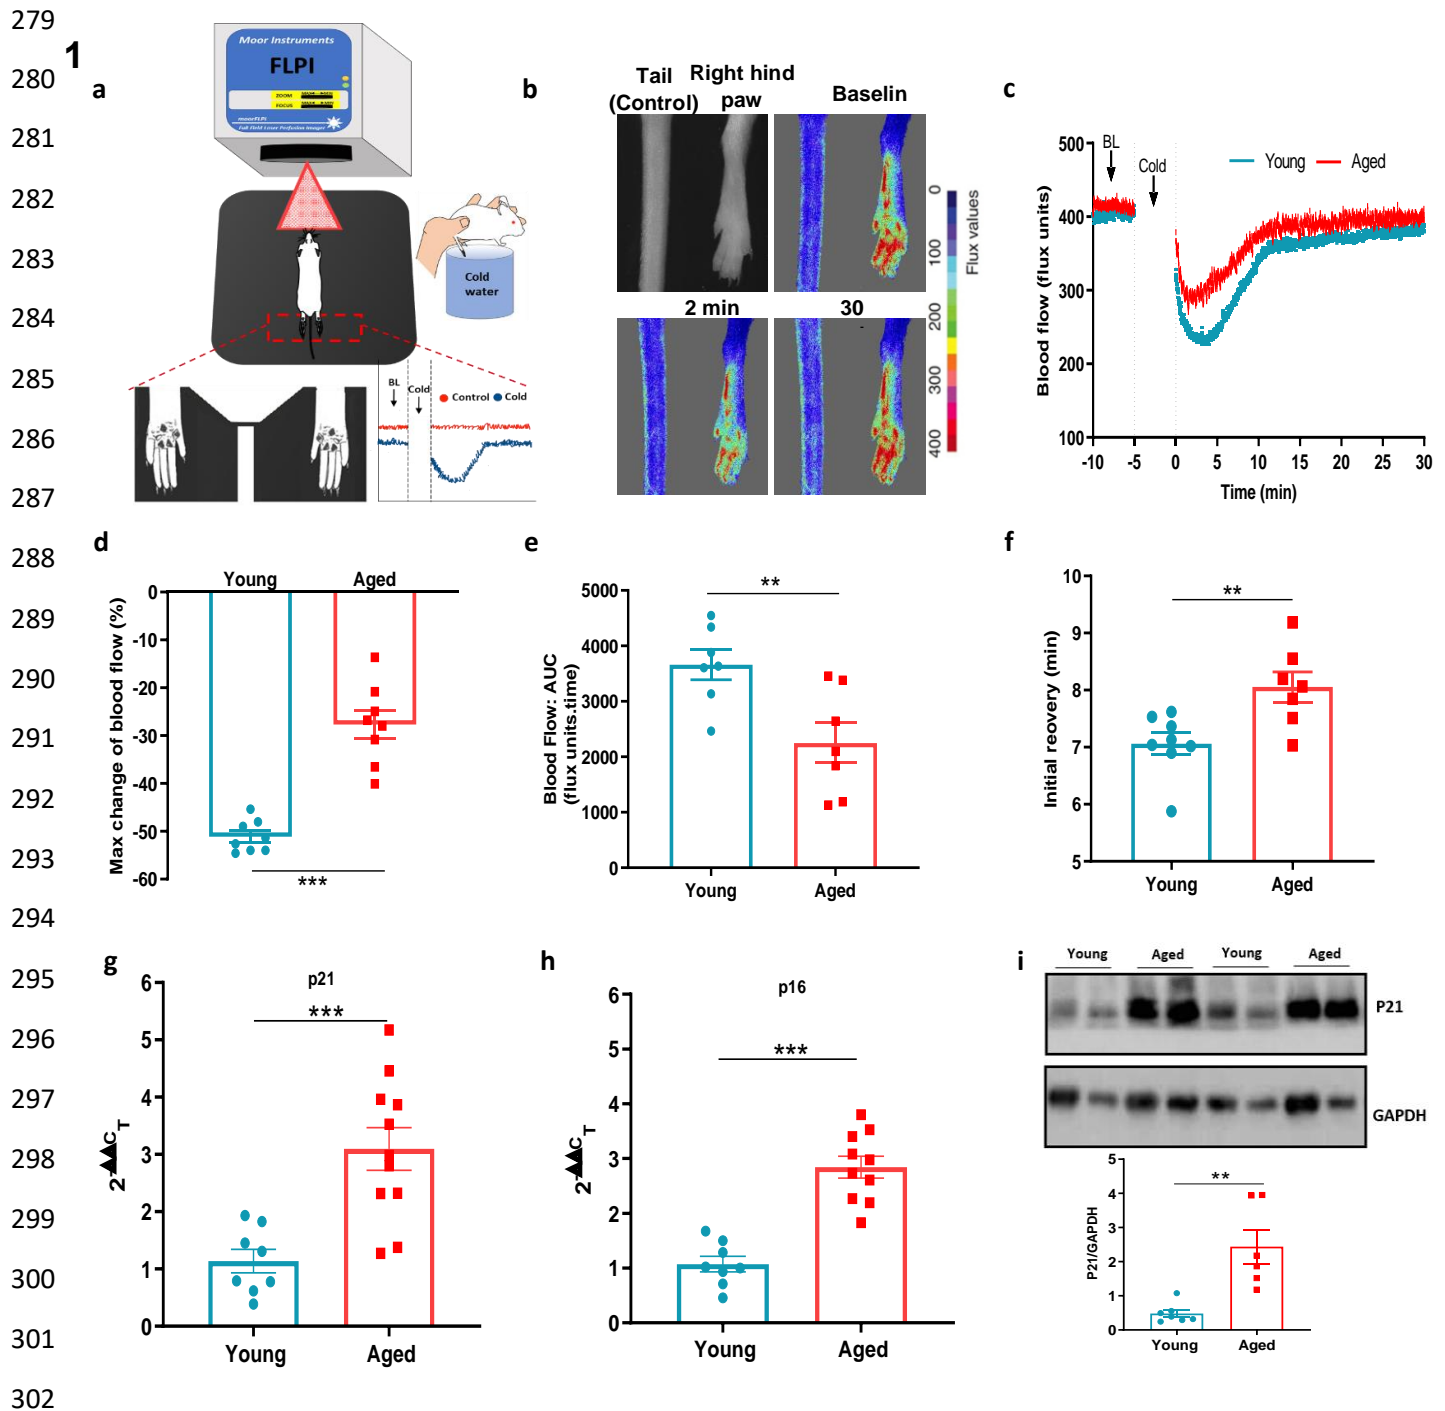

303 **Figure 1: Cold-induced vascular response is impaired with ageing.** (a) Diagram illustrates the experimental  
 304 setup of cold-induced vascular response protocol; FLPI from top measures the blood flow in the hindpaw of the  
 305 anaesthetized mouse when on a heating mat in response to cold water immersion. The expanded component  
 306 (highlighted by dotted red lines) shows the hindpaw region in which the blood flow is recorded, and a graph of  
 307 typical blood flow response is shown. Recording is paused for cold treatment where one of the hindpaw is  
 308 immersed in cold water for 5 min. (b) Representative FLPI image shows the blood flow in cold-treated hind paw  
 309 at baseline, 2 min and 30 min after the cold water treatment. (c) Graph shows the raw blood flow trace (mean)  
 310 of vascular response with cold (4°C) water treatment (n=8). (d) % change in hindpaw blood flow from baseline  
 311 to 0-2min following cold water treatment (maximum vasoconstriction). (e) The AUC to maximum vasoconstriction  
 312 point assessed by area under the curve (AUC). (f) Time of blood flow recovery immediately after maximum  
 313 vasoconstriction until the start of the plateau period. (g-h) RT-PCR CT analysis shows fold change of p21 and  
 314 p16 gene expression normalized to three housekeeping genes in dorsal root ganglia (DRG) of young and aged  
 315 mice. (i) Representative western blot of p21 in hindpaw skin of young and aged mice and densitometric analysis  
 316 normalized to GAPDH. (BL = baseline). Data is presented as mean and all error bars indicate s.e.m. \*\*p<0.01,  
 317 \*\*\*p<0.001. (Two-tailed Student's t-test).

318 **2**

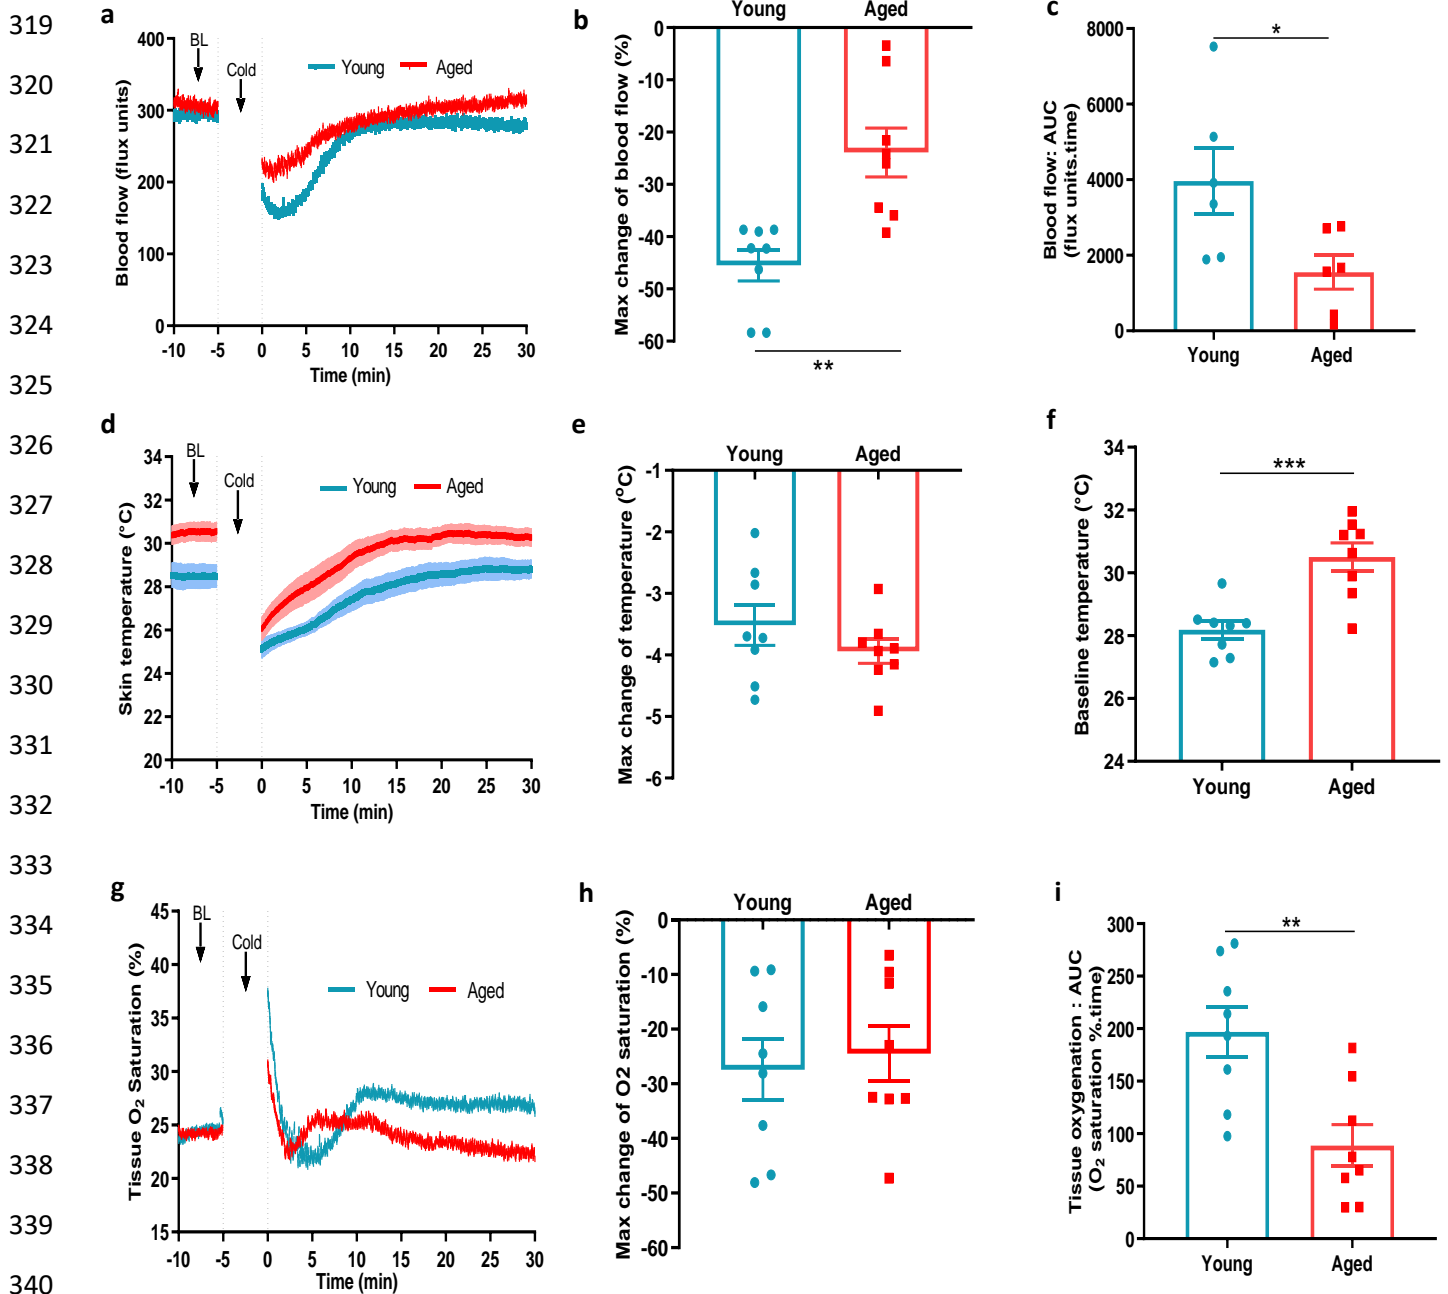

341

342 **Figure 2: Blood flow, skin temperature and tissue oxygen saturation with cold treatment in ageing.**  
 343 **(a)** Mean blood flow trace of the vascular response with cold (4°C) water treatment (n=8). **(b)** % change in  
 344 hindpaw blood flow from baseline to 0-2min following cold treatment (maximum vasoconstriction). **(c)** The  
 345 vasoconstriction response caused by cold water treatment represented by area under curve (AUC). **(d)** The  
 346 mean blood flow ( $\pm$  s.e.m.) recordings of hindpaw skin temperature with cold water treatment. **(e)** Maximum  
 347 reduction in skin temperature following 5 min cold treatment. **(f)** The baseline skin temperature. **(g)** % mean  
 348 tissue oxygen saturation during cold water treatment. **(h)** % maximum change in tissue oxygen saturation  
 349 from baseline following cold water treatment **(i)** % tissue oxygen saturation recovery after cold water  
 350 treatment assessed by area under the curve. (BL = baseline). Data is presented as mean and all error bars  
 351 indicate s.e.m. \* $p < 0.05$ , \*\* $p < 0.01$ , \*\*\* $p < 0.001$ . (Two-tailed Student's t-test).

352

353



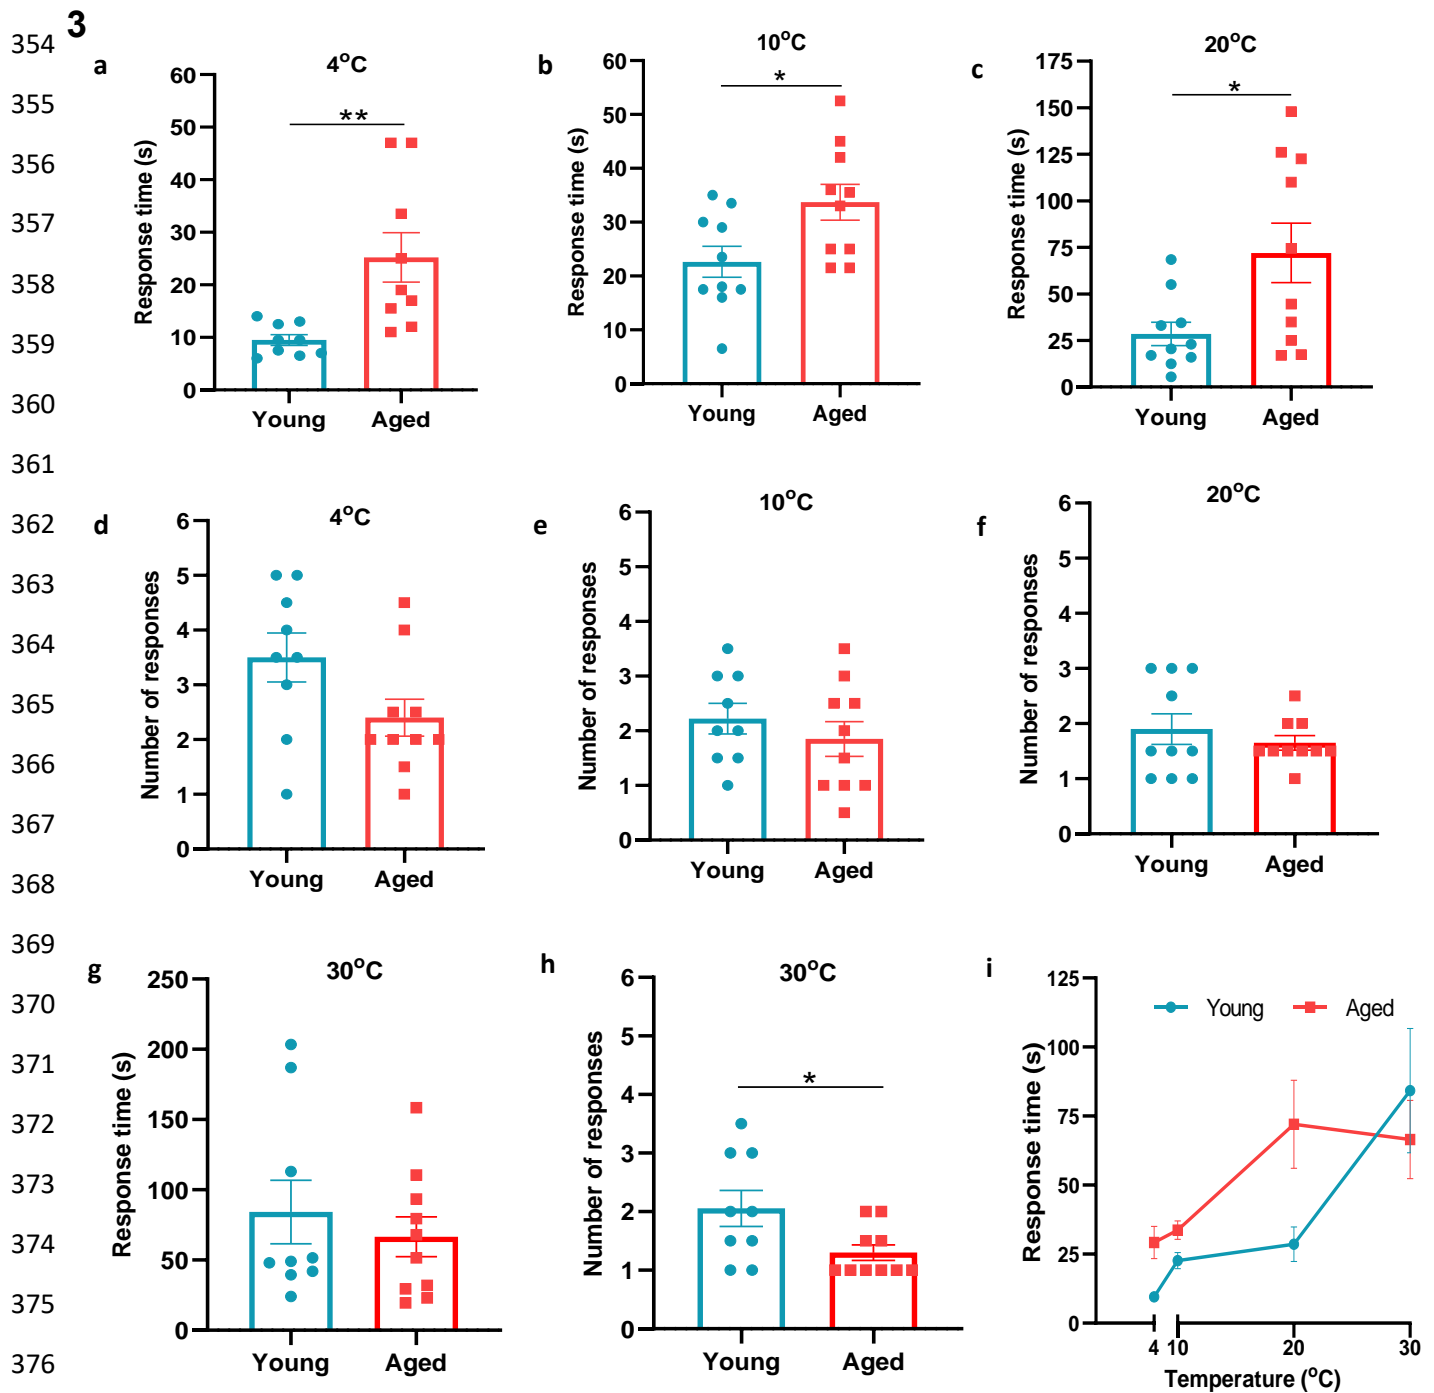

377

378

379

380

381

382

383

384

385

386

387

388

389

390

391

392

393

394

395

396

**Figure 3: Behavioural analysis with cold plate in young and aged mice (a-c)** Time of first response of mice to cold plate set at 4°C, 10°C, and 20°C. **(d-f)** The total number of responses from mice during the cold plate experiment at 4°C, 10°C, and 20°C. **(g-h)** Time of first response of mice to cold plate set at 30°C and total number of responses. **(i)** Line graph illustrates the difference in mean response time at the four different temperatures the cold plate assay was performed, between young and aged mice. All results are shown as mean  $\pm$  s.e.m. \* $p < 0.05$ , \*\* $p < 0.01$ . (Two-tailed Student's t-test).

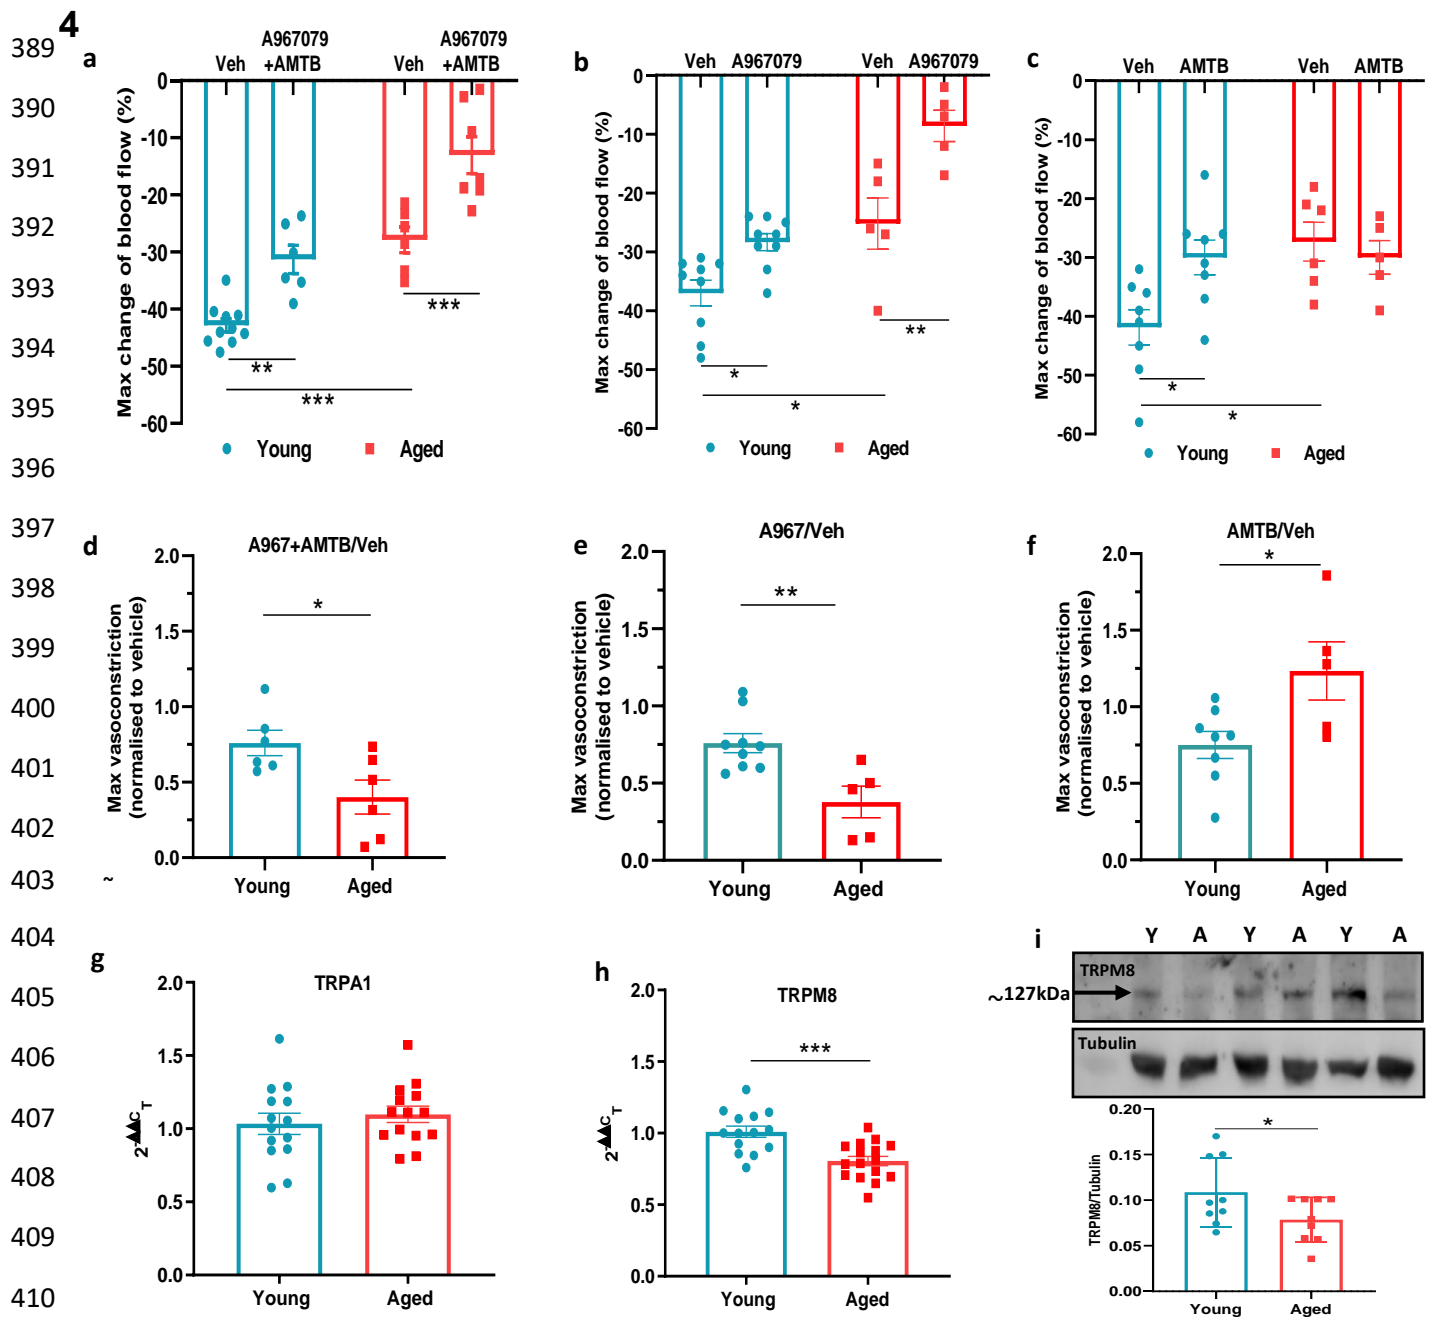

**Figure 4: TRPA1 and TRPM8 are involved in cold-induced vascular response. Vascular responses with cold (4°C) water treatment in mice pre-treated with combined TRPA1 antagonist A967079 (100 mg kg<sup>-1</sup>) and TRPM8 antagonist AMTB (10 mg kg<sup>-1</sup>), or vehicle control (Veh - 10% DMSO, 10% Tween in saline) i.p. 30 min before cold treatment (maximum vasoconstriction) in mice treated with combined antagonist (a) A967079+AMTB, (b) A967079, and (c) AMTB. (d-f) Maximum vasoconstriction caused by cold water treatment in mice treated with combined antagonist (d) A967079+AMTB, (e) A967079, and (f) AMTB normalized against vehicle treated mice. (g-h) RT-PCR CT analysis shows fold change of (g) TRPA1 and (h) TRPM8 normalized to three housekeeping genes in dorsal root ganglia (DRG). (i) Representative western blot of TRPM8 in DRG of young and aged mice and densitometric analysis normalized to Tubulin (Y=young, A=aged). All results are shown as mean ± s.e.m. \*p<0.05, \*\*p<0.01, \*\*\*p<0.001. (Two-way ANOVA with Tukey's *post hoc* test or Student's *t*-test).**

424  
425  
426

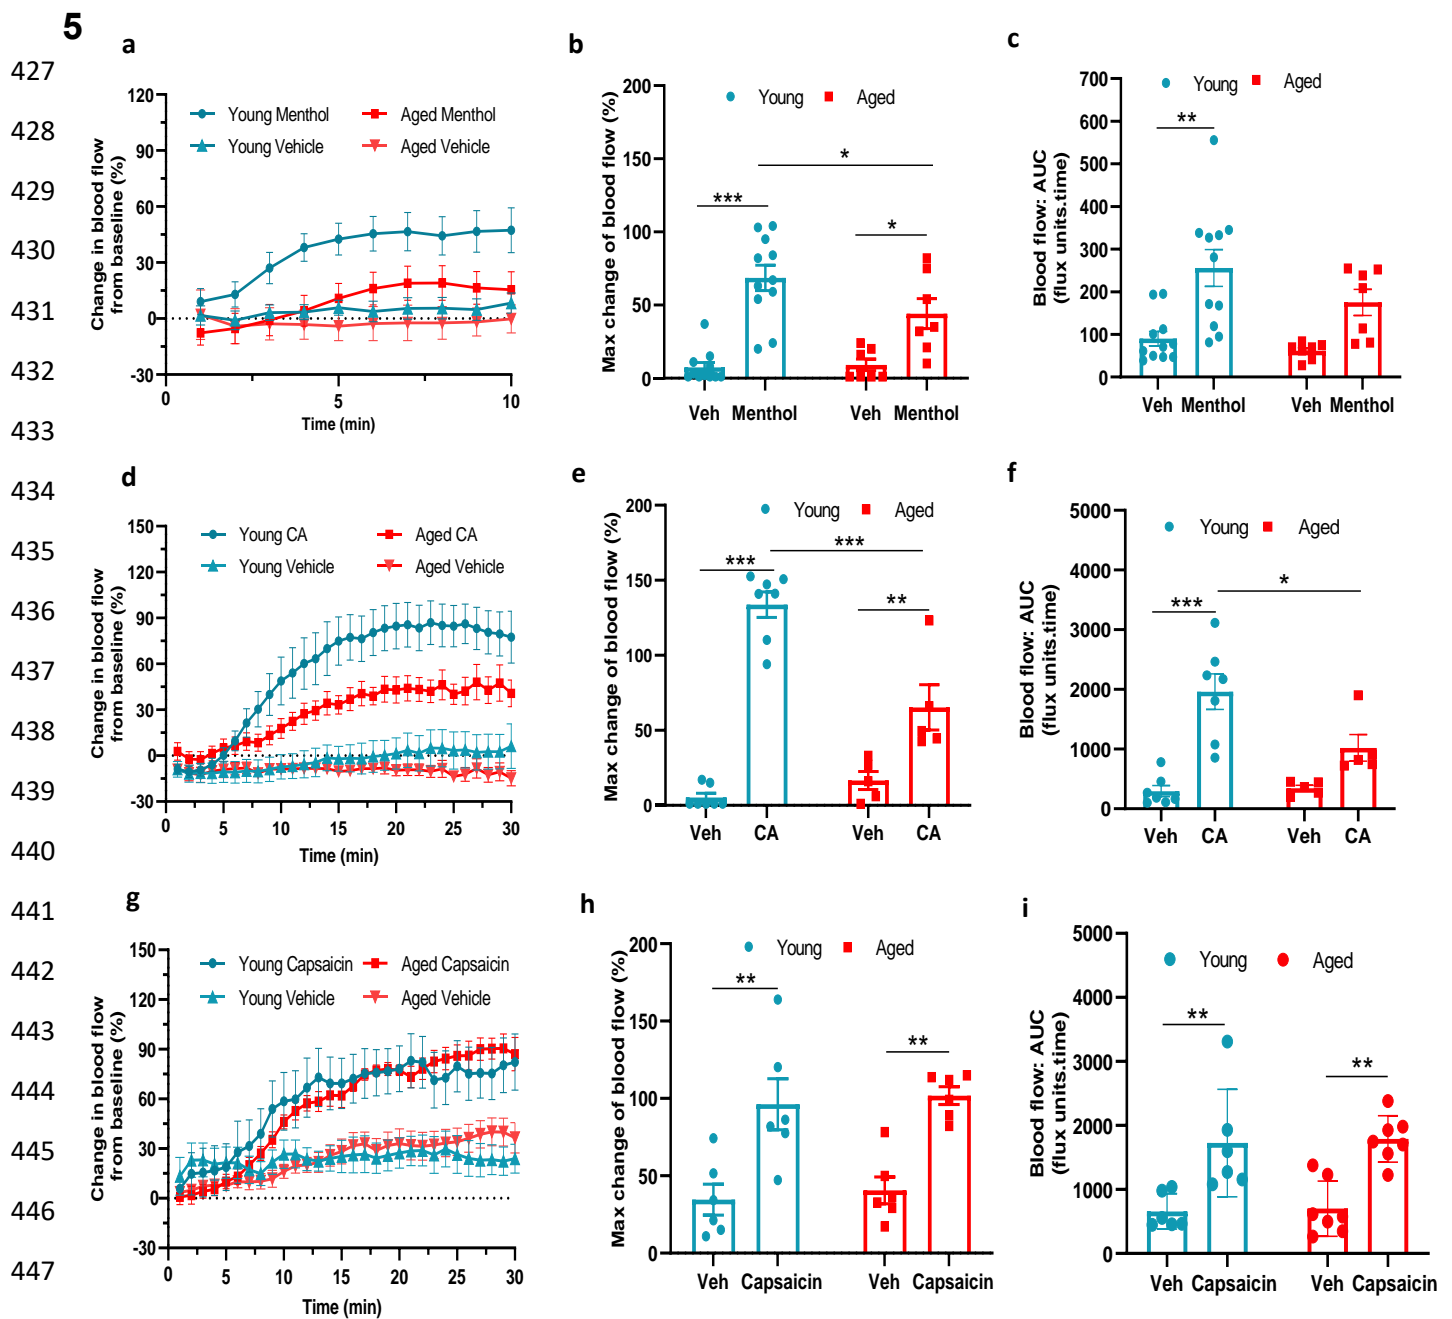

**Figure 5: TRPA1 and TRPM8 activity deteriorates with ageing** (a) Graph shows the % mean  $\pm$  s.e.m. of blood flow change from baseline in response to topical application of menthol (10%) and vehicle (Veh - 10% DMSO in ethanol) in ear of young and aged mice. (b) % maximum change in ear blood flow induced by menthol application in young and aged mice. (c) AUC analysis of % blood flow increase from baseline after menthol application compared to vehicle. (d) Graph shows the % mean  $\pm$  s.e.m. of blood flow change from baseline in response to topical application of cinnamaldehyde (10% CA) and vehicle (10% DMSO in ethanol) in ear of young and aged mice. (e) % maximum change in ear blood flow induced by CA application in young and aged mice. (f) AUC analysis of % blood flow increase from baseline after CA application compared to vehicle. (g) Graph shows the % mean  $\pm$  s.e.m. of blood flow change from baseline in response to topical application of capsaicin (10%) and vehicle (10% DMSO in ethanol) in ear of young and aged mice. (h) % maximum change in ear blood flow induced by capsaicin application in young and aged mice. (i) AUC analysis of % blood flow increase from baseline after capsaicin application compared to vehicle. All results are shown as mean  $\pm$  s.e.m. \* $p < 0.05$ , \*\* $p < 0.01$ , \*\*\* $p < 0.001$ . (Two-way ANOVA with Tukey's *post hoc* test).

463

464

465 **6.**

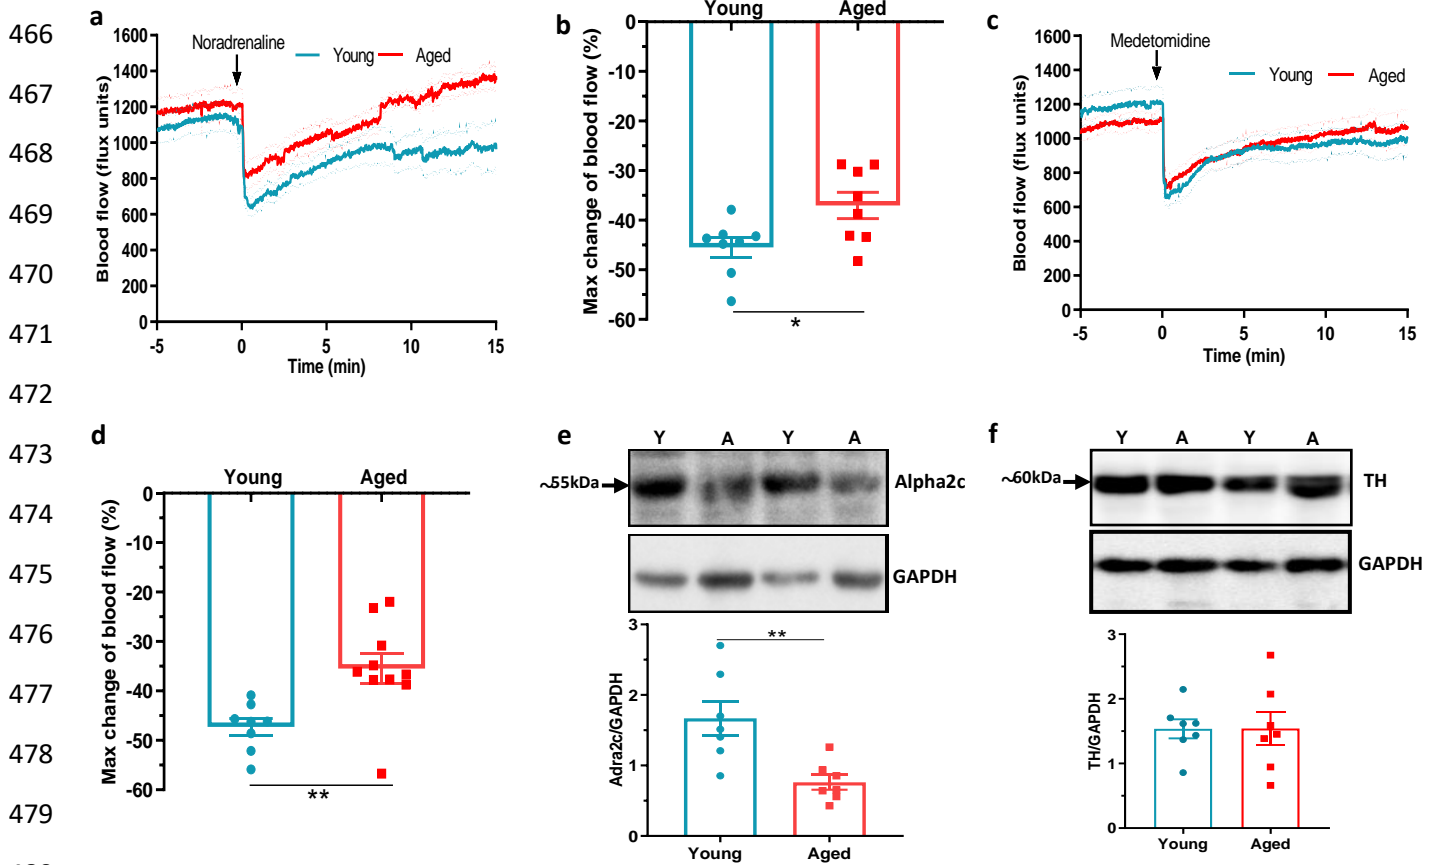

470  
471  
472  
473  
474  
475  
476  
477  
478  
479  
480  
481  
482

483 **Figure 6: Dysfunctional sympathetic signalling in ageing** (a) Graph shows the mean  $\pm$  s.e.m. blood  
484 flow in hindpaw with intraplantar injection of noradrenaline (1.25ng/ $\mu$ l in saline in 20 $\mu$ l) in young and aged  
485 mice (n=8). (b) % maximum change in blood flow from baseline induced by noradrenaline (maximum  
486 vasoconstriction). (c) Graph shows the mean  $\pm$  s.e.m. blood flow in hindpaw with intraplantar injection of  
487 medetomidine (1.25ng/ $\mu$ l in saline in 20 $\mu$ l) in young and aged mice (n=8-10) (d) % maximum change in  
488 blood flow from baseline induced by medetomidine (maximum vasoconstriction). (e) Representative  
489 western blot of alpha2C ( $\alpha_{2c}$ ) adrenoceptor in mice hindpaw skin with densitometric analysis normalized to  
490 GAPDH. (f) Representative western blot of tyrosine hydroxylase (TH) in mice hindpaw skin with  
491 densitometric analysis normalized to GAPDH (Y=young, A=aged).

492  
493  
494  
495  
496  
497  
498  
499  
500

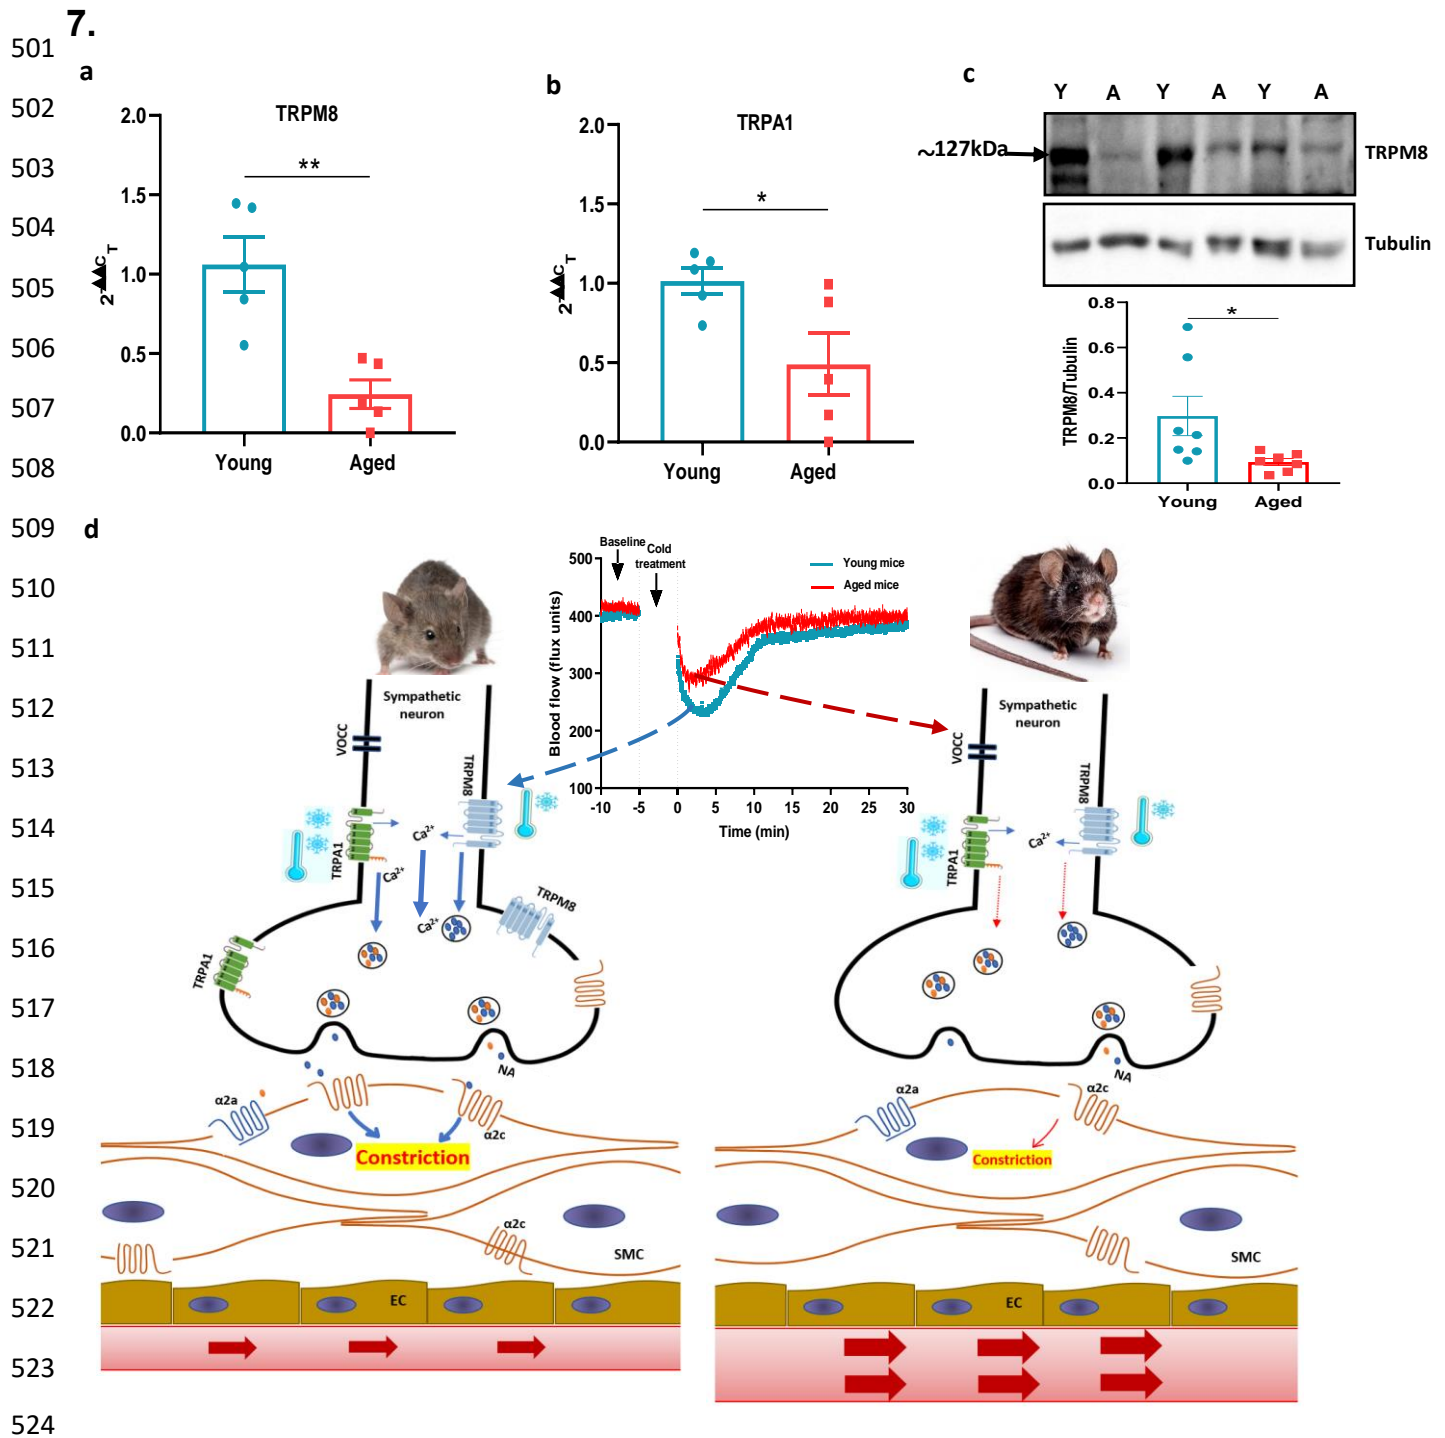

**Figure 7: Sympathetic-sensory signalling and influence of ageing (a-b)** RT-PCR CT analysis shows the expression and fold change of TRPA1 and TRPM8 in young and aged sympathetic ganglia normalized to three housekeeping genes collected from the cervical and thoracic paravertebral region. **(c)** The western blot analysis of TRPM8 in sympathetic ganglia of young and aged mice. All results are shown as mean  $\pm$  s.e.m. \* $p < 0.05$ , \*\* $p < 0.01$ . (Two-tailed Student's t-test). **(d)** Proposed cold-induced vasoconstriction signalling pathway in young and aged mice. The local cold exposure produces rapid vasoconstriction which is significantly blunted in the aged mice (see blood flow graph at top centre). Cold water (4°C) exposure to hindpaw activates the cold receptors TRPA1 and TRPM8 in sympathetic nerves, which leads to increased intracellular calcium and release of NA. This signalling, however, is significantly downregulated in aged mice due to diminished expression of TRPA1/TRPM8 in sympathetic nerves. NA acts on the post-synaptic  $\alpha_{2c}$  adrenergic receptors on smooth muscle cells to mediate vasoconstriction. However,  $\alpha_{2c}$  adrenergic receptors are also significantly diminished in aged mice, which leads to reduced signalling. All of these factors contribute to an attenuated vascular cold response in aged mice compared to young mice.

538  $\alpha_{2c}$  – alpha2c adrenoceptor,  $\alpha_{2a}$  – alpha2a adrenoceptor, VOCC- voltage operated calcium channel, NA –  
539 noradrenaline,  $Ca^{2+}$  - calcium, SMC- smooth muscle cell, EC – endothelial cell.

540

## 541 Discussion

542 The role of TRPA1 and TRPM8 as cold-sensitive thermoreceptors is established (Story et al.,  
543 2003, Bautista et al., 2007, Karashima et al., 2009, Peier et al., 2002, McKemy, Neuhausser  
544 & Julius, 2002) and our research has demonstrated the essential role they play as vascular  
545 cold sensors (Aubdool et al., 2014, Pan et al., 2018). Much less was known about their activity  
546 in ageing, until this study. We provide a new insight into the changing roles of TRPA1 and  
547 TRPM8 in the vascular response to cold in ageing; the expression and activity of TRPM8 is  
548 significantly diminished, and to a lesser extent TRPA1 mediated signalling too.

549 The vascular response to the cold is a primary physiological response, which we have  
550 previously teased out the key mechanisms for, consisting of TRPA1/M8 initiated  $\alpha_{2c}$ -mediated  
551 sympathetic vasoconstriction followed by TRPA1/M8 mediated sensory vascular relaxation  
552 after localised cold exposure in the mouse paw. Here, we show that the response is  
553 functionally deficient in ageing as measured by two different laser blood flow measurement  
554 techniques. Both components of the cold-induced vascular response were impaired in ageing  
555 with blunted vasoconstriction that will lead to increased heat loss, and a slower rate of recovery  
556 that may lead to cold-induced injuries (Keatinge, 1957, Roustit et al., 2011, Herrick, 2005). We  
557 were surprised that the diminished response was observed with even moderate ageing (13-  
558 15 months old mice; equivalent to middle age in humans). However, the ageing nature of the  
559 mice was confirmed by the observation of increased expression of the established ageing  
560 markers p16 and p21 (Baker et al., 2016, Sharpless, Sherr, 2015, Hudgins et al., 2018). This  
561 finding is in keeping with the concept that although ageing-induced pathological conditions  
562 and frailty appear at a later age, the underlying physiological changes that manifest those  
563 conditions begin at a middle age of around 40 years old in humans. Indeed, this is when the  
564 brain volume and weight start to decline (Peters, 2006); cardiovascular functions begin to  
565 decline and elite athletes start to lose stamina (Pal et al., 2014, Mühlberg, Platt, 1999). We  
566 found that the baseline skin temperature was significantly higher in the aged mice than young  
567 mice, potentially due to greater heat loss from aged mice in keeping with the notion that it is  
568 harder to maintain core body temperature as ageing occurs. The tissue oxygen saturation was  
569 reduced during the vascular cold response but recovered substantially in the young compared  
570 to the aged mice. Overall, the findings show that the cold induced cutaneous vascular  
571 response is significantly diminished in ageing.

572 It is known that sensory modalities decline with ageing, but usually studies involve frail 24-  
573 month old mice. Indeed, in one of the only studies of TRP thermo-receptors in ageing, to our  
574 knowledge, authors investigated the changes in TRPM8 expressing neurons in cornea with  
575 ageing and its relevance to dry eye disease (Alcalde et al., 2018). Here in our study, we  
576 delineate that activity and expression of one of the prominent sensory cold channels (TRPM8)  
577 diminishes with moderate ageing; relevant to the impaired vascular response to cold that we  
578 have observed. We designed experiments to evaluate the ability of the mouse to sense cold  
579 using a cold plate behavioural assay at innocuous cool (TRPM8 range) and noxious cold  
580 (TRPA1 range) temperatures. We observed a delayed latency to the cold response in  
581 moderately aged mice compared to young mice at three different cold temperatures, 4°C,  
582 10°C, and 20°C implying impaired sensory signalling of TRPM8 and TRPA1 receptors.  
583 Importantly, the longest delayed latency was observed at 20°C, which falls under the TRPM8  
584 activation range implying that with ageing TRPM8 signalling deteriorates more, relative to that  
585 of TRPA1.

586 Using combined selective antagonists of TRPA1 and TRPM8, we show that blocking both  
587 receptors inhibits the cold-induced cutaneous vascular response in young mice, as expected.

588 Intriguingly, the same treatment produced a relatively stronger inhibitory response in the aged  
589 mice. This implies that with ageing the cold signalling relies profoundly more on cold TRP  
590 channels. These results may also indicate that at younger ages other protein/s besides TRPA1  
591 and TRPM8 play a crucial part in the cold signalling, but these activities begin to decline with  
592 ageing. This includes the  $\alpha_{2c}$  receptor as discussed below, although a range of other  
593 candidates have also been proposed (Zimmermann et al., 2011, Noël et al., 2009, Luiz et al.,  
594 2019, Gong et al., 2019). Importantly, when we investigated the effect of the TRPA1 antagonist  
595 alone, we observed a very similar inhibitory profile to that of the combination of TRPA1 and  
596 TRPM8 antagonists. However, the TRPM8 antagonist treatment alone, was effective in the  
597 young mice, but not in the aged mice. This provided key evidence that the activity of TRPM8  
598 especially, is diminished in ageing. TRPM8 was discovered as a sensory receptor expressed  
599 in DRG and trigeminal ganglia (TG) that is activated by cool temperatures ( $<28^{\circ}\text{C}$ ) (McKemy,  
600 Neuhauser & Julius, 2002); although the link with TRPA1 containing CGRP fibres is less well  
601 defined (Hondoh et al., 2010, Kobayashi et al., 2005). Since then, various reports have  
602 suggested that TRPM8 is expressed in a wider range of tissues and is involved in multiple  
603 physiological functions including thermoregulation (Moraes et al., 2017, Hirai et al., 2018,  
604 Yang et al., 2006). Indeed, it is established that the deletion/antagonism of TRPM8 increases  
605 heat loss and reduces core body temperature (Almeida et al., 2012, Reimúndez et al., 2018).

606 By this stage we had revealed a reduced expression and activity of TRPM8 in the vascular  
607 cold response and cold sensing. However, we have previously defined TRPA1 as an essential  
608 vascular sensor to cold, playing a major role in the cold induced vascular response alongside  
609 TRPM8 (Aubdool et al., 2014). Therefore, it was surprising to observe that expression of  
610 TRPA1, unlike TRPM8, did not diminish in the DRG with ageing, especially as the cold-sensing  
611 data from the cold plate at noxious cold temperatures revealed that the response is also  
612 impaired at noxious temperatures in ageing. To learn more, we studied the ability of the  
613 TRPA1 agonist cinnamaldehyde (CA) to increase cutaneous blood flow; as TRPA1 is localised  
614 to CGRP<sup>+</sup> sensory nerves (Aubdool et al., 2016). CA-induced vasodilation was significantly  
615 impaired in the aged mice compared to young, supporting the concept of impaired functional  
616 TRPA1 vascular responses in ageing. We observed a similar significantly blunted response  
617 with the TRPM8 agonist menthol in aged mice, although TRPM8 localisation to sensory nerves  
618 is more limited than that of TRPA1 (Kobayashi et al., 2005). This led us to question whether  
619 activity of all TRP receptors deteriorates with ageing, through investigating the non-cold  
620 sensing TRPV1 agonist capsaicin which activates predominantly CGRP<sup>+</sup> C-fibres (Story et al.,  
621 2003, Sharrad et al., 2015). In contrast to menthol and CA, capsaicin caused a similar level of  
622 increased blood flow in all mice regardless of age indicating TRPV1 activity does not  
623 deteriorate with ageing, and supporting our behaviour data at  $30^{\circ}\text{C}$ , which falls outside TRPA1  
624 and TRPM8 activation ranges. These results suggest that only the signalling of cold TRP  
625 receptors; TRPA1 and TRPM8 is impaired with ageing.

626 The cold-induced vasoconstriction phase is mediated by sympathetic drive comprising of  
627 noradrenergic nerves and this signalling has been shown to decline with ageing (Degroot,  
628 Kenney, 2007, Frank et al., 2000, Greaney, Alexander & Kenney, 2015). Thus, we aimed to  
629 elucidate the sympathetic signalling in young and aged mice, which we began by investigating  
630 the effect of exogenous agonist NA. NA administered locally to the paw evoked cutaneous  
631 vasoconstriction in young mice that was significantly blunted in the aged mice, suggesting that  
632 NA-mediated response diminishes in aged mice. Nonetheless, NA is a non-selective agonist  
633 for all adrenoceptors, but peripheral cutaneous vasoconstriction is mediated via  $\alpha$  adrenergic  
634 receptors (Drew, Whiting, 1979), with cold specific vasoconstriction primarily mediated via  $\alpha_{2c}$   
635 adrenoceptors subtype (Bailey et al., 2004, Honda et al., 2007). Therefore, we used the  
636 selective  $\alpha_2$  agonist medetomidine which induced vasoconstriction that was also significantly  
637 blunted in the aged mice. The result suggests that either  $\alpha_{2c}$  receptor sensitivity declines with  
638 ageing (Thompson, Holowatz & Kenney, 2005) or  $\alpha_{2c}$  receptor number reduces with ageing  
639 which has been suggested to occur in ageing human saphenous vein (Hyland, Docherty,

640 1985). In our study, we found a significant reduction in the expression of  $\alpha_{2c}$  adrenoceptors.  
641 We also investigated whether the level of NA or its synthesis was impaired in ageing and  
642 observed no difference in the level of tyrosine hydroxylase (including the active form of  
643 phosphorylated tyrosine hydroxylase), the enzyme involved in the rate limiting synthesis of NA  
644 production. This indicates that NA synthesis is not affected in ageing.

645 The cold-induced vascular response is perceived as a reflex where peripheral sensory nerves  
646 sense the cold stimulus and send information to the central nervous system (CNS). In turn,  
647 the CNS processes the information and produces an appropriate response via activation of  
648 sympathetic nerves to cause vasoconstriction in skin (Chotani et al., 2000). Classically, it is  
649 established that sensory receptors TRPA1 and TRPM8 that sense cold reside in sensory  
650 nerves and alpha-adrenergic receptors reside in sympathetic nerves and smooth muscle cells  
651 to modulate vasoconstriction. However, we have previously shown that the cold-induced  
652 vasoconstrictor response occurs when the sensory C-fibre component is removed with  
653 resiniferatoxin treatment (Aubdool et al., 2014). This clear result raises the possibility that the  
654 cold sensitive proteins TRPA1 and TRPM8 may be expressed in other tissues besides sensory  
655 nerves and modulate the vascular tone, as suggested to be the case in some organs (Earley,  
656 2012, Johnson et al., 2005, Yang et al., 2006). The sensory nerves and sympathetic nerves  
657 are known to have close proximation around blood vessels and have a reciprocal trophic  
658 influence (Terenghi et al., 1986). Thus, we questioned whether cold TRP channels were  
659 expressed on sympathetic nerves to directly modulate the vascular tone. We found that both  
660 TRPA1 and TRPM8 are expressed in the sympathetic ganglia (SG) collected from the cervical  
661 and thoracic paravertebral regions, in keeping with previous studies (Smith et al., 2004), but  
662 debated. Furthermore, the expression of both receptors were significantly diminished in the  
663 SG collected from the aged mice compared to young mice. Collectively, these findings suggest  
664 that cold stimuli activate TRPA1 and TRPM8 channels on sympathetic nerves, which induces  
665 calcium-dependent release of vesicles containing NA into the synaptic cleft where they  
666 activate the  $\alpha_{2c}$  adrenoceptor on smooth muscle cells to mediate vasoconstriction (Fig 7d).  
667 This signalling cascade has been shown in PC12 cells, which is regularly used as *in-vitro*  
668 model for sympathetic neurons (Smith et al., 2004, Peixoto-Neves, Soni & Adebisi, 2018,  
669 Yoshimura, Nakagawa & Endo, 2016). It indicates a potential for sympathetic-sensory  
670 interactive signalling in skin, which weakens as ageing progresses in turn affecting the  
671 sensitivity of the vascular response to cold.

672 To conclude, we have revealed that the cold induced defensive responses decline with ageing.  
673 There is an impairment in the sympathetic vasoconstrictor pathway concomitant with a  
674 functional deterioration and molecular loss of TRPM8 and TRPA1 signalling as well as  
675 diminished  $\alpha_{2c}$  adrenergic receptor expression and activity. We consider that the finding of  
676 diminished TRPM8 expression with ageing is indicative of a major influence of this channel  
677 that would lead to the impaired cold induced vascular response in ageing.

678

## 679 **Methods**

680 **Animals.** Female CD1 mice used in this study were either bred in the Biological Services Unit,  
681 King's College London or purchased from Charles River (Kent, UK). The animals were housed  
682 in a climatically controlled environment with an ambient temperature of 22°C, including a 12-  
683 hour light/dark (7am-7pm) cycle with free access to drinking water and standard chow *ad*  
684 *libitum*. Young mice were 2-3 months old and aged mice were 13-16 months old. All  
685 experiments were performed according to the Animal Care and Ethics committee at King's  
686 College London, in addition to the regulations set by the UK home office Animals (Scientific  
687 Procedures) act 1986. Experiments using animals were designed and reported in line with the  
688 ARRIVE guidelines, which form the NC3Rs initiative. Animals were randomly assigned to



689 different groups and the investigator was blinded to drug treatments and where possible to the  
690 age of the animals.

691 **Cutaneous blood flow measurement by full-field laser perfusion imager.** Mice were  
692 terminally anaesthetized with i.p. injection of ketamine (75 mg kg<sup>-1</sup>) and medetomidine (1 mg  
693 kg<sup>-1</sup>). Wherever possible to comply with the NC3Rs reduction guidelines, experiments were  
694 designed using recovery anaesthesia, which was either s.c. 150 mg kg<sup>-1</sup> ketamine and 4.25  
695 mg kg<sup>-1</sup> xylazine, or isoflurane gas. 5% isoflurane (in oxygen) was used to induce anaesthesia,  
696 which was followed by 2% for maintenance during the experimental procedure. Full-field Laser  
697 Perfusion Imager (FLPI, Moor Instruments, UK) was used to measure blood flow in the hind  
698 paw or the ear of the mice. The mice were placed in a ventral position on a heating mat to  
699 maintain core body temperature at 37°C during blood flow measurement. For the cold-induced  
700 blood flow measurement in hindpaw, after anaesthesia, the blood flow was measured on the  
701 plantar surface of hindpaw for 5 min as baseline measurement. Then, the ipsilateral hindpaw  
702 at the level between tibia and calcaneus was immersed in cold water (4°C for 5 min) for cold  
703 exposure. After the cold treatment, mice were placed back on the heating mat (37°C) to  
704 measure blood flow recovery for 30 min. The FLPI uses laser light to produce speckle pattern  
705 that gets interfered by blood flow which is measured as arbitrary flux units (X10<sup>3</sup> flux units).  
706 For the agonist-induced blood flow measurement in ear, after anaesthesia, the blood flow was  
707 measured for 5 min as baseline recording. 10µl of either cinnamaldehyde (10%), menthol  
708 (10%), or capsaicin (10%) was topically applied to both sides of the ipsilateral ear and 10µl  
709 vehicle solution (10% DMSO in ethanol) was applied to the contralateral ear. Then blood flow  
710 was measured for 30 min after cinnamaldehyde and capsaicin treatment and for 10 min after  
711 menthol treatment. All treatments produced a gradual increase in blood flow. For  
712 NA/medetomidine-induced blood flow measurement in hindpaw, after anaesthesia, blood flow  
713 was measured on the plantar surface for 5 min as baseline recording. Intraplantar injection of  
714 NA/medetomidine (1.25ng/ul) was performed and blood flow was measured for 15 min.

715 **Cutaneous blood flow, temperature and oxygen saturation measurement by laser  
716 Doppler techniques.** A probe connected to the moorVMS-LDF (Laser Doppler Perfusion and  
717 Temperature Monitor) and moorVMS-OXY (Tissue Oxygen and Temperature Monitor) (Moor  
718 Instruments) was used to simultaneously measure blood flow, temperature and tissue oxygen  
719 saturation in a small, localized area (~5mm diameter) on the plantar surface of the ipsilateral  
720 hind paw (central region immediately adjacent to the digits). The probe was held on a retort  
721 stand clamp 1mm above the skin surface. After inducing anaesthesia with i.p. injection of  
722 ketamine (75 mg kg<sup>-1</sup>) and medetomidine (1 mg kg<sup>-1</sup>), the blood flow was measured (baseline  
723 recording) on the plantar surface central area immediately adjacent to the digits for 5 min. The  
724 ipsilateral hindpaw was immersed in cold water (4°C for 5 min) at the level between tibia and  
725 calcaneus. After the cold treatment, mice were placed back on the heating mat (37°C) to  
726 record all measurements during the recovery period for 30 min. The blood flow was measured  
727 using doppler technique and expressed in arbitrary flux units, and tissue oxygen saturation  
728 was measured using white light spectroscopy method.

729 **Drugs and reagents.** The TRPA1 antagonist A967079 ((1E,3E)-1-(4-Fluorophenyl)-2-methyl-  
730 1-pentene-3-one oxime) (Alomone Labs, # A-225) was dissolved in 10% DMSO, 10% Tween-  
731 80 in saline. The TRPM8 antagonist AMTB (N-(3-aminopropyl)-2-[(3-methylphenyl) methyl]  
732 oxy-N-(2-thienylmethyl) benzamide hydrochloride salt) (Alomone Labs, #A-305) was dissolved  
733 in 10% DMSO in saline. Both antagonists were administered i.p. 30 min before the cold  
734 treatment. Cinnamaldehyde (Sigma Aldrich, #W228613, >95% purity), menthol (Alfa Aesar,  
735 #A18098, 98% purity), capsaicin (Sigma Aldrich, #M2028, >95% purity) were prepared with

736 10% DMSO in ethanol solution. 1.25ng/ $\mu$ l NA (Sigma) and 1.25ng/ $\mu$ l medetomidine (Orion  
737 Pharma) were administered with intraplantar injection in 20 $\mu$ l saline.

738 **Behavioural testing using the cold plate.** The nociceptive cold sensitivity response of mice  
739 was tested using a hot/cold thermal plate (Ugo Basile 35100). A quick temperature non-  
740 contact infrared thermometer (Linear labs) was used to confirm the set temperature of the  
741 plate before each experiment. Prior to the experiments, mice were acclimatised to the room  
742 for 30 min for 3 days, and the thermal plate by individually placing them on the plate at room  
743 temperature for 2 min on each of the 3 days. At the start of the experiment, the plate was set  
744 to the chosen temperature (4°C, 10°C, 20°C and 30°C) and each mouse was placed  
745 individually onto the plate in turn. The cold response was detected as either paw licking or  
746 paw withdrawal/jumping and the total number of responses observed within 1 min (for 4°C and  
747 10°C) and 5 min (20°C and 30°C) were tallied. Each temperature was repeated twice on  
748 different days to obtain an average which was used to plot the final graph.

749 **Quantitative polymerase chain reaction.** Real time PCR (RT-qPCR) was used to quantify  
750 changes in mRNA collected from pooled dorsal root ganglia (DRG), brown adipose tissue  
751 (BAT) and sympathetic ganglia collected from thoracic paravertebral region. The total RNA  
752 was isolated and purified according to manufacturer's instructions using the RNeasy Micro Kit  
753 (Qiagen, #74004). The RNA concentration and absorbance ratio (A260/280 and A260/230)  
754 were measured using Nanodrop 2000 spectrophotometer. 500ng of purified RNA was reverse  
755 transcribed using SuperScript VILO cDNA synthesis kit (Thermo fisher scientific, #11754050).  
756 qPCR was performed with 10ng of cDNA using PowerUp SYBR Green master mix kit (Thermo  
757 fisher Scientific, #A25780) in 7900HT Real-Time PCR machine (Applied Biosystems, USA).  
758 All primers (Supplementary table 1) were designed using Primer-BLAST software (NCBI)  
759 according to MIQE guidelines and checked on the primer stat website.  
760 ([http://www.bioinformatics.org/sms2/pcr\\_primer\\_stats.html](http://www.bioinformatics.org/sms2/pcr_primer_stats.html)). The melting curve analysis was  
761 performed after reactions to confirm specificity of the primers. The analysis was performed  
762 using delta delta CT method and expressed as fold change normalized to the average of three  
763 housekeeping genes.

764 **Western blotting.** The western blotting analysis was performed as previously described  
765 (Aubdool et al., 2014). The tissue was lysed with SDS lysis buffer which was made up with  
766 inhibitors of both phosphatases and proteases (1 tablet per 10ml, #4693159001 +  
767 #4906845001, Sig-ma-Aldrich). The tissue was then homogenised using a tissue lyser  
768 (Qiagen, #85300). The protein concentration was determined using the Bradford protein dye  
769 binding assay (#5000113 + #5000114, Bio-Rad). 50 $\mu$ g of protein was separated by  
770 electrophoresis in an SDS-polyacrylamide gel which was then transferred using the semi dry  
771 method, onto PVDF membranes. The membrane was incubated in a blocking buffer made up  
772 of 5% BSA in Phosphate-buffered saline- tween (PBS-T) (0.1% Tween). The membrane was  
773 blocked for 1 hr in RT except for TRPM8 which was blocked for 2.5 hr as per manufacturer's  
774 instruction. The membranes with primary antibodies were incubated overnight at 4°C.  
775 Following the washing step with PBS-T, the membranes were probed with secondary antibody  
776 (Horseradish peroxidase conjugated) (1:2000 dilution, #AP132P Sigma) for 1 hr at RT. The  
777 enhanced chemiluminescence (ECL, Pierce) was used for visual development of the  
778 membranes inside a gel doc system. Bands were normalised to housekeeping genes  $\alpha$ -tubulin  
779 (1:2000, #MAB1864, Merck Millipore), GAPDH (1:2000, #PA1987, ThermoFisher) and  $\beta$ -actin  
780 (1:2000, #A5441, Sigma Aldrich). Quantitative western blot analysis was performed using  
781 Image J (NIH, USA). The primary antibodies were made in 3% PBST solution at 1:500 dilution  
782 for TRPM8 (Alomone Labs #ACC049), 1:1000 dilution for  $\alpha_{2c}$  adrenergic receptor (Bio-Techne

783 #NB100-93554), phospho TH (Bio-Techne #NB300-173), total TH (Bio-Techne #NB300-109),  
784 p21 (Santa Cruz #sc-6246).

785 **Experimental design and data analysis.** The majority of the experiments conducted in this  
786 study consisted of two groups (young/aged) or four groups with drug treatments (young/aged  
787 and vehicle/drug), therefore the power analysis from our lab (Aubdool et al., 2014) with a power  
788 of 80% (0.8) for a confidence of 5% (0.05) recommended n=8, which was strictly adhered to  
789 where possible. The order of the mice (young or aged) and treatments (vehicle/drug) received  
790 were randomised during experimental protocols. Data was analysed using either two-tailed  
791 Student's t-tests or two-way ANOVA followed by Tukey's *post hoc* test. All column data are  
792 plotted as dot plots to show variability and n numbers for each data set. All data are expressed  
793 as mean  $\pm$  SEM.  $p < 0.05$  was considered to represent a significant difference. GraphPad Prism  
794 (version 8) was used as statistics software for analysis.

795

## 796 Acknowledgements

797 This work was primarily funded by BBSRC (BB/P005616/1). It was also supported in part by  
798 Versus Arthritis (ARUK21524) and British Heart Foundation (BHF- FS/19/42/34527 and  
799 PG/12/34/29557).

800

## 801 Author contributions

802 DT and SDB designed the research. DT, JV, BB, FA, SL and SN carried out research. DT, BB  
803 and SL performed data analysis. XK helped with blinding and data analysis. DT, BB and SDB  
804 drafted the manuscript and all authors contributed to finalizing the manuscript.

805

## 806 Competing interests

807 The authors declare no competing interests.

808

## 809 References.

810 Alcalde, I., Íñigo-Portugués, A., González-González, O., Almaraz, L., Artime, E., Morenilla-  
811 Palao, C., Gallar, J., Viana, F., Merayo-Llodes, J. & Belmonte, C. 2018, "Morphological  
812 and functional changes in TRPM8-expressing corneal cold thermoreceptor neurons  
813 during aging and their impact on tearing in mice", *Journal of Comparative Neurology*,  
814 vol. 526, no. 11, pp. 1859-187410.1002/cne.24454.

815 Almeida, M.C., Hew-Butler, T., Soriano, R.N., Rao, S., Wang, W., Wang, J., Tamayo, N.,  
816 Oliveira, D.L., Nucci, T.B., Aryal, P., Garami, A., Bautista, D., Gavva, N.R. &  
817 Romanovsky, A.A. 2012, "Pharmacological Blockade of the Cold Receptor TRPM8  
818 Attenuates Autonomic and Behavioral Cold Defenses and Decreases Deep Body  
819 Temperature", *The Journal of Neuroscience*, vol. 32, no. 6, pp. 2086-  
820 209910.1523/JNEUROSCI.5606-11.2012.

821 Aubdool, A.A., Graepel, R., Kodji, X., Alawi, K.M., Bodkin, J.V., Srivastava, S., Gentry, C.,  
822 Heads, R., Grant, A.D., Fernandes, E.S., Bevan, S. & Brain, S.D. 2014, "TRPA1 is  
823 essential for the vascular response to environmental cold exposure", *Nature*  
824 *Communications*, vol. 5, pp. 573210.1038/ncomms6732.

- 825 Aubdool, A.A., Kodji, X., Abdul-Kader, N., Heads, R., Fernandes, E.S., Bevan, S. & Brain,  
826 S.D. 2016, "TRPA1 activation leads to neurogenic vasodilatation: involvement of  
827 reactive oxygen nitrogen species in addition to CGRP and NO", *British Journal of*  
828 *Pharmacology*, vol. 173, no. 15, pp. 2419-243310.1111/bph.13519.
- 829 Bailey, S.R., Eid, A.H., Mitra, S., Flavahan, S. & Flavahan, N.A. 2004, "Rho kinase mediates  
830 cold-induced constriction of cutaneous arteries: role of alpha2C-adrenoceptor  
831 translocation", *Circulation Research*, vol. 94, no. 10, pp. 1367-  
832 137410.1161/01.RES.0000128407.45014.58.
- 833 Baker, D.J., Childs, B.G., Durik, M., Wijers, M.E., Sieben, C.J., Zhong, J., Saltness, R.A.,  
834 Jeganathan, K.B., Verzosa, G.C., Pezeshki, A., Khazaie, K., Miller, J.D. & van Deursen,  
835 J.M. 2016, "Naturally occurring p16(Ink4a)-positive cells shorten healthy lifespan",  
836 *Nature*, vol. 530, no. 7589, pp. 184-18910.1038/nature16932.
- 837 Bautista, D.M., Siemens, J., Glazer, J.M., Tsuruda, P.R., Basbaum, A.I., Stucky, C.L., Jordt,  
838 S. & Julius, D. 2007, "The menthol receptor TRPM8 is the principal detector of  
839 environmental cold", *Nature*, vol. 448, no. 7150, pp. 204-20810.1038/nature05910.
- 840 Billeter, A.T., Hohmann, S.F., Druen, D., Cannon, R. & Polk, H.C. 2014, "Unintentional  
841 perioperative hypothermia is associated with severe complications and high mortality in  
842 elective operations", *Surgery*, vol. 156, no. 5, pp. 1245-  
843 125210.1016/j.surg.2014.04.024.
- 844 Chotani, M.A., Flavahan, S., Mitra, S., Daunt, D. & Flavahan, N.A. 2000, "Silent alpha(2C)-  
845 adrenergic receptors enable cold-induced vasoconstriction in cutaneous arteries",  
846 *American Journal of Physiology. Heart and Circulatory Physiology*, vol. 278, no. 4, pp.  
847 107510.1152/ajpheart.2000.278.4.H1075.
- 848 Craighead, D.H., McCartney, N.B., Tumlinson, J.H. & Alexander, L.M. 2017, "Mechanisms  
849 and time course of menthol-induced cutaneous vasodilation", *Microvascular research*,  
850 vol. 110, pp. 43-4710.1016/j.mvr.2016.11.008.
- 851 Daanen, H.A.M. & van der Struijs, Norbert R. 2005, "Resistance Index of Frostbite as a  
852 predictor of cold injury in arctic operations", *Aviation, Space, and Environmental*  
853 *Medicine*, vol. 76, no. 12, pp. 1119-1122.
- 854 Degroot, D.W. & Kenney, W.L. 2007, "Impaired defense of core temperature in aged  
855 humans during mild cold stress", *American Journal of Physiology. Regulatory,*  
856 *Integrative and Comparative Physiology*, vol. 292, no. 1, pp.  
857 10310.1152/ajpregu.00074.2006.
- 858 Dhaka, A., Murray, A.N., Mathur, J., Earley, T.J., Petrus, M.J. & Patapoutian, A. 2007,  
859 "TRPM8 is required for cold sensation in mice", *Neuron*, vol. 54, no. 3, pp. 371-  
860 37810.1016/j.neuron.2007.02.024.
- 861 Drew, G.M. & Whiting, S.B. 1979, "Evidence for two distinct types of postsynaptic alpha-  
862 adrenoceptor in vascular smooth muscle in vivo", *British Journal of Pharmacology*, vol.  
863 67, no. 2, pp. 207-21510.1111/j.1476-5381.1979.tb08668.x.
- 864 Dutta, S. & Sengupta, P. 2016, "Men and mice: Relating their ages", *Life Sciences*, vol. 152,  
865 pp. 244-24810.1016/j.lfs.2015.10.025.
- 866 Earley, S. 2012, "TRPA1 channels in the vasculature", *British Journal of Pharmacology*, vol.  
867 167, no. 1, pp. 13-2210.1111/j.1476-5381.2012.02018.x.

- 868 Frank, S.M., Raja, S.N., Bulcao, C. & Goldstein, D.S. 2000, "Age-related thermoregulatory  
869 differences during core cooling in humans", *American Journal of Physiology.*  
870 *Regulatory, Integrative and Comparative Physiology*, vol. 279, no. 1, pp.  
871 34910.1152/ajpregu.2000.279.1.R349.
- 872 Gavva, N.R., Davis, C., Lehto, S.G., Rao, S., Wang, W. & Zhu, D.X. 2012, "Transient  
873 Receptor Potential Melastatin 8 (TRPM8) Channels are Involved in Body Temperature  
874 Regulation", *Molecular Pain*, vol. 8, no. 36, pp. 1744-806910.1186/1744-8069-8-36.
- 875 Gentry, C., Stoakley, N., Andersson, D.A. & Bevan, S. 2010, "The roles of iPLA2, TRPM8  
876 and TRPA1 in chemically induced cold hypersensitivity", *Molecular Pain*, vol. 6, pp.  
877 410.1186/1744-8069-6-4.
- 878 Gong, J., Liu, J., Ronan, E.A., He, F., Cai, W., Fatima, M., Zhang, W., Lee, H., Li, Z., Kim,  
879 G., Pipe, K.P., Duan, B., Liu, J. & Xu, X.Z.S. 2019, "A Cold-Sensing Receptor Encoded  
880 by a Glutamate Receptor Gene", *Cell*, vol. 178, no. 6, pp. 1375-  
881 138610.1016/j.cell.2019.07.034.
- 882 Gouin, O., L'Herondelle, K., Lebonvallet, N., Le Gall-Ianotto, C., Sakka, M., Buhé, V., Plée-  
883 Gautier, E., Carré, J., Lefevre, L., Misery, L. & Le Garrec, R. 2017, "TRPV1 and  
884 TRPA1 in cutaneous neurogenic and chronic inflammation: pro-inflammatory response  
885 induced by their activation and their sensitization", *Protein & Cell*, vol. 8, no. 9, pp. 644-  
886 66110.1007/s13238-017-0395-5.
- 887 Grant, A.D., Pinter, E., Salmon, A.L. & Brain, S.D. 2005, "An examination of neurogenic  
888 mechanisms involved in mustard oil-induced inflammation in the mouse", *European*  
889 *Journal of Pharmacology*, vol. 507, no. 1-3, pp. 273-28010.1016/j.ejphar.2004.11.026.
- 890 Greaney, J.L., Alexander, L.M. & Kenney, W.L. 2015, "Sympathetic control of reflex  
891 cutaneous vasoconstriction in human aging", *Journal of Applied Physiology (Bethesda,*  
892 *Md.: 1985)*, vol. 119, no. 7, pp. 771-78210.1152/jappphysiol.00527.2015.
- 893 Guergova, S. & Dufour, A. 2011, "Thermal sensitivity in the elderly: a review", *Ageing*  
894 *Research Reviews*, vol. 10, no. 1, pp. 80-9210.1016/j.arr.2010.04.009.
- 895 Herrick, A.L. 2005, "Pathogenesis of Raynaud's phenomenon", *Rheumatology (Oxford,*  
896 *England)*, vol. 44, no. 5, pp. 587-59610.1093/rheumatology/keh552.
- 897 Hirai, A., Aung, N.Y., Ohe, R., Nishida, A., Kato, T., Meng, H., Ishizawa, K., Fujii, J. &  
898 Yamakawa, M. 2018, "Expression of TRPM8 in human reactive lymphoid tissues and  
899 mature B-cell neoplasms", *Oncology Letters*, vol. 16, no. 5, pp. 5930-  
900 593810.3892/ol.2018.9386.
- 901 Holowatz, L.A., Thompson-Torgerson, C. & Kenney, W.L. 2010, "Aging and the control of  
902 human skin blood flow", *Frontiers in bioscience : a journal and virtual library*, vol. 15, pp.  
903 718-739.
- 904 Honda, M., Suzuki, M., Nakayama, K. & Ishikawa, T. 2007, "Role of  $\alpha$ 2C-adrenoceptors in  
905 the reduction of skin blood flow induced by local cooling in mice", *British Journal of*  
906 *Pharmacology*, vol. 152, no. 1, pp. 91-10010.1038/sj.bjp.0707380.
- 907 Hondoh, A., Ishida, Y., Ugawa, S., Ueda, T., Shibata, Y., Yamada, T., Shikano, M.,  
908 Murakami, S. & Shimada, S. 2010, "Distinct expression of cold receptors (TRPM8 and  
909 TRPA1) in the rat nodose-petrosal ganglion complex", *Brain Research*, vol. 1319, pp.  
910 60-6910.1016/j.brainres.2010.01.016.

- 911 Hudgins, A.D., Tazearslan, C., Tare, A., Zhu, Y., Huffman, D. & Suh, Y. 2018, "Age- and  
912 Tissue-Specific Expression of Senescence Biomarkers in Mice", *Frontiers in Genetics*,  
913 vol. 9, pp. 5910.3389/fgene.2018.00059.
- 914 Hyland, L. & Docherty, J.R. 1985, "An investigation of age-related changes in pre- and  
915 postjunctional alpha-adrenoceptors in human saphenous vein", *European Journal of*  
916 *Pharmacology*, vol. 114, no. 3, pp. 361-36410.1016/0014-2999(85)90381-4.
- 917 Jain, A., Brönneke, S., Kolbe, L., Stäb, F., Wenck, H. & Neufang, G. 2011, "TRP-channel-  
918 specific cutaneous eicosanoid release patterns", *Pain*, vol. 152, no. 12, pp. 2765-  
919 277210.1016/j.pain.2011.08.025.
- 920 Johnson, J.M., Yen, T.C., Zhao, K. & Kosiba, W.A. 2005, "Sympathetic, sensory, and  
921 nonneuronal contributions to the cutaneous vasoconstrictor response to local cooling",  
922 *American Journal of Physiology-Heart and Circulatory Physiology*, vol. 288, no. 4, pp.  
923 H1573-H157910.1152/ajpheart.00849.2004.
- 924 Karashima, Y., Talavera, K., Everaerts, W., Janssens, A., Kwan, K.Y., Vennekens, R., Nilius,  
925 B. & Voets, T. 2009, "TRPA1 acts as a cold sensor in vitro and in vivo", *Proceedings of*  
926 *the National Academy of Sciences of the United States of America*, vol. 106, no. 4, pp.  
927 1273-127810.1073/pnas.0808487106.
- 928 Keatinge, W.R. 1957, "The effect of general chilling on the vasodilator response to cold",  
929 *The Journal of Physiology*, vol. 139, no. 3, pp. 497-50710.1113/jphysiol.1957.sp005908.
- 930 Kobayashi, K., Fukuoka, T., Obata, K., Yamanaka, H., Dai, Y., Tokunaga, A. & Noguchi, K.  
931 2005, "Distinct expression of TRPM8, TRPA1, and TRPV1 mRNAs in rat primary  
932 afferent neurons with a $\delta$ /c-fibers and colocalization with trk receptors", *Journal of*  
933 *Comparative Neurology*, vol. 493, no. 4, pp. 596-60610.1002/cne.20794.
- 934 Kwan, K.Y., Allchorne, A.J., Vollrath, M.A., Christensen, A.P., Zhang, D., Woolf, C.J. &  
935 Corey, D.P. 2006, "TRPA1 Contributes to Cold, Mechanical, and Chemical Nociception  
936 but Is Not Essential for Hair-Cell Transduction", *Neuron*, vol. 50, no. 2, pp. 277-  
937 28910.1016/j.neuron.2006.03.042.
- 938 Lewis, T. 1930, "Observations upon the reactions of the vessels of the human skin to cold",  
939 *Heart*, vol. 15, pp. 177-208.
- 940 Luiz, A.P., MacDonald, D.I., Santana-Varela, S., Millet, Q., Sikandar, S., Wood, J.N. &  
941 Emery, E.C. 2019, "Cold sensing by NaV1.8-positive and NaV1.8-negative sensory  
942 neurons", *Proceedings of the National Academy of Sciences of the United States of*  
943 *America*, vol. 116, no. 9, pp. 3811-381610.1073/pnas.1814545116.
- 944 McKemy, D.D., Neuhausser, W.M. & Julius, D. 2002, "Identification of a cold receptor  
945 reveals a general role for TRP channels in thermosensation", *Nature*, vol. 416, no.  
946 6876, pp. 52-5810.1038/nature719.
- 947 Moraes, M.N., de Assis, Leonardo Vinicius Monteiro, Henriques, F.D.S., Batista, M.L., Güler,  
948 A.D. & Castrucci, Ana Maria de Lauro 2017, "Cold-sensing TRPM8 channel participates  
949 in circadian control of the brown adipose tissue", *Biochimica Et Biophysica Acta.*  
950 *Molecular Cell Research*, vol. 1864, no. 12, pp. 2415-  
951 242710.1016/j.bbamcr.2017.09.011.
- 952 Morrison, S.F. & Nakamura, K. 2019, "Central Mechanisms for Thermoregulation", *Annual*  
953 *Review of Physiology*, vol. 81, pp. 285-30810.1146/annurev-physiol-020518-114546.

- 954 Morrison, S.F. & Nakamura, K. 2011, "Central neural pathways for thermoregulation",  
955 *Frontiers in Bioscience (Landmark Edition)*, vol. 16, pp. 74-10410.2741/3677.
- 956 Mühlberg, W. & Platt, D. 1999, "Age-dependent changes of the kidneys: pharmacological  
957 implications", *Gerontology*, vol. 45, no. 5, pp. 243-25310.1159/000022097.
- 958 Nassini, R., Materazzi, S., Benemei, S. & Geppetti, P. 2014, "The TRPA1 channel in  
959 inflammatory and neuropathic pain and migraine", *Reviews of Physiology, Biochemistry  
960 and Pharmacology*, vol. 167, pp. 1-4310.1007/112\_2014\_18.
- 961 Noël, J., Zimmermann, K., Busserolles, J., Deval, E., Alloui, A., Diochot, S., Guy, N.,  
962 Borsotto, M., Reeh, P., Eschalier, A. & Lazdunski, M. 2009, "The mechano-activated K+  
963 channels TRAAK and TREK-1 control both warm and cold perception", *The EMBO  
964 Journal*, vol. 28, no. 9, pp. 1308-131810.1038/emboj.2009.57.
- 965 Office for National Statistics 2019, "Excess winter mortality in England and Wales: 2018 to  
966 2019 (provisional) and 2017 to 2018 (final)", *Office for National Statistics*, .
- 967 Pal, R., Singh, S.N., Chatterjee, A. & Saha, M. 2014, "Age-related changes in cardiovascular  
968 system, autonomic functions, and levels of BDNF of healthy active males: role of yogic  
969 practice", *Age (Dordrecht, Netherlands)*, vol. 36, no. 4, pp. 968310.1007/s11357-014-  
970 9683-7.
- 971 Pan, Y., Thapa, D., Baldissera, L., Argunhan, F., Aubdool, A.A. & Brain, S.D. 2018,  
972 "Relevance of TRPA1 and TRPM8 channels as vascular sensors of cold in the  
973 cutaneous microvasculature", *Pflugers Archiv*, vol. 470, no. 5, pp. 779-  
974 78610.1007/s00424-017-2085-9.
- 975 Peier, A.M., Moqrich, A., Hergarden, A.C., Reeve, A.J., Andersson, D.A., Story, G.M.,  
976 Earley, T.J., Dragoni, I., McIntyre, P., Bevan, S. & Patapoutian, A. 2002, "A TRP  
977 Channel that Senses Cold Stimuli and Menthol", *Cell*, vol. 108, no. 5, pp. 705-  
978 71510.1016/S0092-8674(02)00652-9.
- 979 Peixoto-Neves, D., Soni, H. & Adebisi, A. 2018, "Oxidant-induced increase in norepinephrine  
980 secretion from PC12 cells is dependent on TRPM8 channel-mediated intracellular  
981 calcium elevation", *Biochemical and Biophysical Research Communications*, vol. 506,  
982 no. 3, pp. 709-71510.1016/j.bbrc.2018.10.120.
- 983 Peters, R. 2006, "Ageing and the brain", *Postgraduate Medical Journal*, vol. 82, no. 964, pp.  
984 84-8810.1136/pgmj.2005.036665.
- 985 Reimúndez, A., Fernández-Peña, C., García, G., Fernández, R., Ordás, P., Gallego, R.,  
986 Pardo-Vazquez, J.L., Arce, V., Viana, F. & Señarís, R. 2018, "Deletion of the Cold  
987 Thermoreceptor TRPM8 Increases Heat Loss and Food Intake Leading to Reduced  
988 Body Temperature and Obesity in Mice", *Journal of Neuroscience*, vol. 38, no. 15, pp.  
989 3643-3656.
- 990 Roustit, M., Blaise, S., Millet, C. & Cracowski, J. 2011, "Impaired transient vasodilation and  
991 increased vasoconstriction to digital local cooling in primary Raynaud's phenomenon",  
992 *American Journal of Physiology. Heart and Circulatory Physiology*, vol. 301, no. 2, pp.  
993 32410.1152/ajpheart.00246.2011.
- 994 Señarís, R., Ordás, P., Reimúndez, A. & Viana, F. 2018, "Mammalian cold TRP channels:  
995 impact on thermoregulation and energy homeostasis", *Pflugers Archiv: European  
996 Journal of Physiology*, vol. 470, no. 5, pp. 761-77710.1007/s00424-018-2145-9.

- 997 Sharpless, N.E. & Sherr, C.J. 2015, "Forging a signature of in vivo senescence", *Nature*  
998 *Reviews. Cancer*, vol. 15, no. 7, pp. 397-40810.1038/nrc3960.
- 999 Sharrad, D.F., Hibberd, T.J., Kyloh, M.A., Brookes, S.J.H. & Spencer, N.J. 2015,  
1000 "Quantitative immunohistochemical co-localization of TRPV1 and CGRP in varicose  
1001 axons of the murine oesophagus, stomach and colorectum", *Neuroscience Letters*, vol.  
1002 599, pp. 164-17110.1016/j.neulet.2015.05.020.
- 1003 Silva, D.F., Wenceslau, C.F., Mccarthy, C.G., Szasz, T., Ogbi, S. & Webb, R.C. 2019,  
1004 "TRPM8 channel activation triggers relaxation of pudendal artery with increased  
1005 sensitivity in the hypertensive rats", *Pharmacological research*, vol. 147, pp.  
1006 10432910.1016/j.phrs.2019.104329.
- 1007 Smith, M.P., Beacham, D., Ensor, E. & Koltzenburg, M. 2004, "Cold-sensitive, menthol-  
1008 insensitive neurons in the murine sympathetic nervous system", *Neuroreport*, vol. 15,  
1009 no. 9, pp. 1399-140310.1097/01.wnr.0000126559.35631.54.
- 1010 Stares, J. & Kosatsky, T. 2015, "Hypothermia as a cause of death in British Columbia,  
1011 1998–2012: a descriptive assessment", *CMAJ Open*, vol. 3, no. 4, pp. E352-  
1012 E35810.9778/cmajo.20150013.
- 1013 Story, G.M., Peier, A.M., Reeve, A.J., Eid, S.R., Mosbacher, J., Hricik, T.R., Earley, T.J.,  
1014 Hergarden, A.C., Andersson, D.A., Hwang, S.W., McIntyre, P., Jegla, T., Bevan, S. &  
1015 Patapoutian, A. 2003, "ANKTM1, a TRP-like channel expressed in nociceptive neurons,  
1016 is activated by cold temperatures", *Cell*, vol. 112, no. 6, pp. 819-829.
- 1017 Terenghi, G., Zhang, S.Q., Unger, W.G. & Polak, J.M. 1986, "Morphological changes of  
1018 sensory CGRP-immunoreactive and sympathetic nerves in peripheral tissues following  
1019 chronic denervation", *Histochemistry*, vol. 86, no. 1, pp. 89-9510.1007/BF00492350.
- 1020 Thompson, C.S., Holowatz, L.A. & Kenney, W.L. 2005, "Attenuated noradrenergic sensitivity  
1021 during local cooling in aged human skin", *The Journal of Physiology*, vol. 564, no. Pt 1,  
1022 pp. 313-31910.1113/jphysiol.2004.080788.
- 1023 Yang, X., Lin, M., McIntosh, L.S. & Sham, J.S.K. 2006, "Functional expression of transient  
1024 receptor potential melastatin- and vanilloid-related channels in pulmonary arterial and  
1025 aortic smooth muscle", *American Journal of Physiology. Lung Cellular and Molecular*  
1026 *Physiology*, vol. 290, no. 6, pp. 126710.1152/ajplung.00515.2005.
- 1027 Yoshimura, R., Nakagawa, M. & Endo, Y. 2016, "Cold stimulation evokes exocytotic vesicle  
1028 release from PC12 cells", *Biomedical Research (Tokyo, Japan)*, vol. 37, no. 6, pp. 381-  
1029 38310.2220/biomedres.37.381.
- 1030 Zimmermann, K., Lennerz, J.K., Hein, A., Link, A.S., Kaczmarek, J.S., Delling, M., Uysal, S.,  
1031 Pfeifer, J.D., Riccio, A. & Clapham, D.E. 2011, "Transient receptor potential cation  
1032 channel, subfamily C, member 5 (TRPC5) is a cold-transducer in the peripheral nervous  
1033 system", *Proceedings of the National Academy of Sciences of the United States of*  
1034 *America*, vol. 108, no. 44, pp. 18114-1811910.1073/pnas.1115387108.
- 1035
- 1036
- 1037



1038

1039

## 1040 SUPPLEMENTARY INFORMATION

1041

1042

1  
a

1043

1044

1045

1046

1047

1048

1049

1050

1051

1052

1053

1054

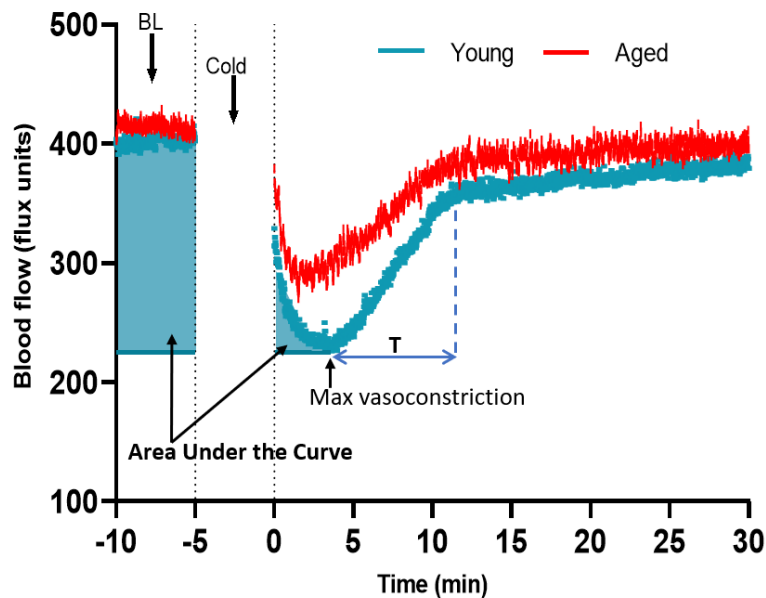

1055

1056 **Supplementary Figure 1: Analysis of cold-induced blood flow in the mouse paw (a)** The  
1057 blood flow graph from cold treatment was used to calculate the maximum vasoconstriction,  
1058 area under the curve (AUC) analysis of vasoconstriction and recovery of blood flow from cold  
1059 treatment. It was not possible to measure blood flow whilst the paw was being cooled. The  
1060 highlighted areas in blue shows the area of the graph from start of the 5 min baseline (BL)  
1061 until peak vasoconstriction that was used to calculate the AUC analysis to detail the magnitude  
1062 of the vasoconstrictor event. The time of immediate blood flow recovery (T) was calculated by  
1063 measuring the time immediately after maximum vasoconstriction until it started to plateau back  
1064 to baseline level (as shown by blue lines). (BL = Baseline). The maximum change of blood  
flow (%) was calculated using the equation below:

1065

$$\text{Max change of blood flow (\%)} = \frac{\text{Max vasoconstriction} - \text{baseline}}{\text{baseline}} \times 100\%$$

1066

1067

1068

1069

1070

1071  
1072  
1073  
1074  
1075  
1076  
1077  
1078  
1079  
1080  
1081  
1082  
1083  
1084  
1085  
1086  
1087  
1088  
1089  
1090  
1091  
1092  
1093  
1094  
1095  
1096  
1097  
1098  
1099  
1100  
1101  
1102

2

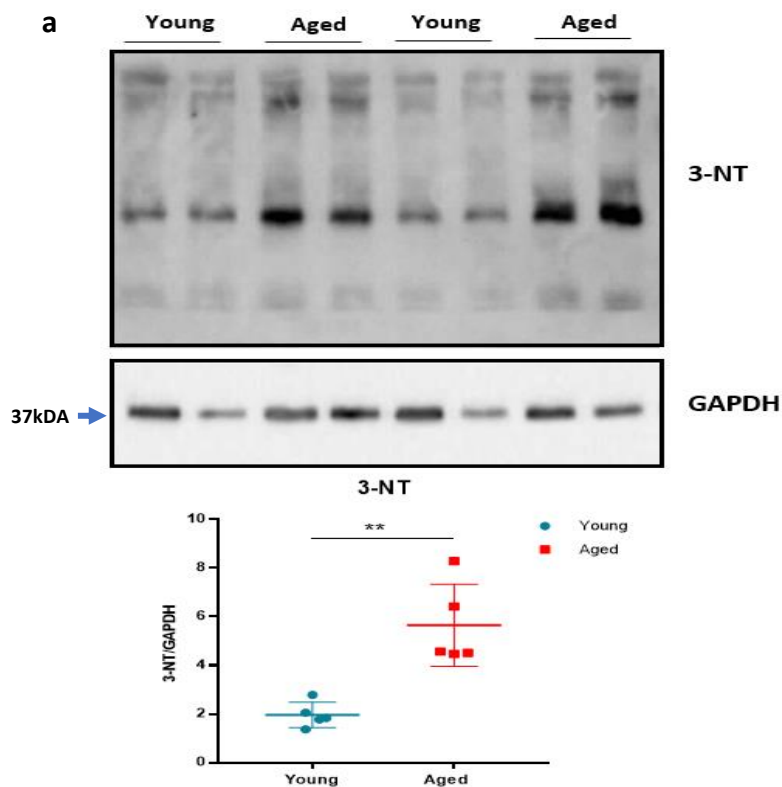

**Supplementary Figure 2: Oxidative stress with ageing. (a)** The representative western blot analysis of 3-nitrotyrosine (3-NT), which is a biomarker of oxidative stress produced by reactive nitrogen species, in hind paw skin of naïve young and aged mice. The densitometric analysis is shown normalized to GAPDH housekeeping gene. Results are shown as mean ± s.e.m. (n=5) \*\*p<0.01. (Two-tailed Student's t-test).

1103  
1104  
1105  
1106  
1107  
1108  
1109  
1110  
1111  
1112  
1113  
1114  
1115  
1116  
1117  
1118  
1119  
1120  
1121  
1122  
1123  
1124  
1125  
1126  
1127  
1128  
1129  
1130  
1131  
1132  
1133  
1134

**3**

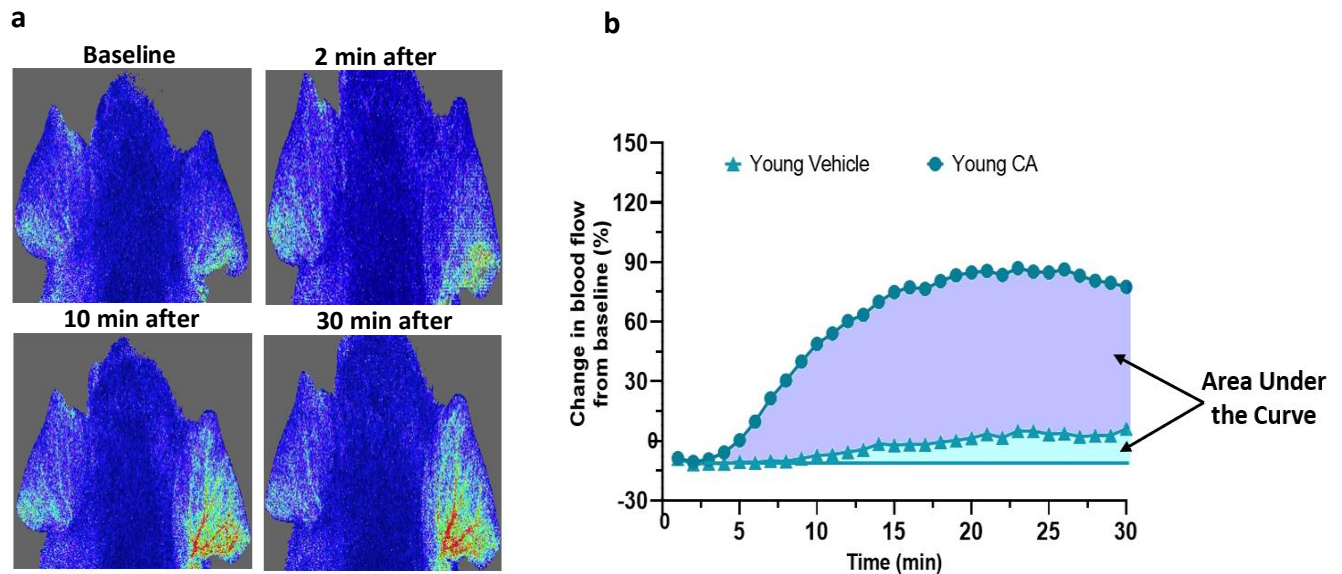

**Supplementary Figure 3: Agonist induced blood flow response in mouse ear. (a)** The representative image from FLPI shows the blood flow response induced by topical application of vehicle (left ear) and 10% cinnamaldehyde (right ear) in the anaesthetised mouse. **(b)** The representative blood flow response graph illustrates the area used for the area under the curve analysis for vehicle (light blue) and cinnamaldehyde (purple).

1135  
1136  
1137  
1138  
1139  
1140  
1141  
1142  
1143  
1144  
1145  
1146  
1147  
1148  
1149  
1150  
1151  
1152  
1153  
1154  
1155  
1156  
1157  
1158  
1159  
1160  
1161  
1162  
1163  
1164

4

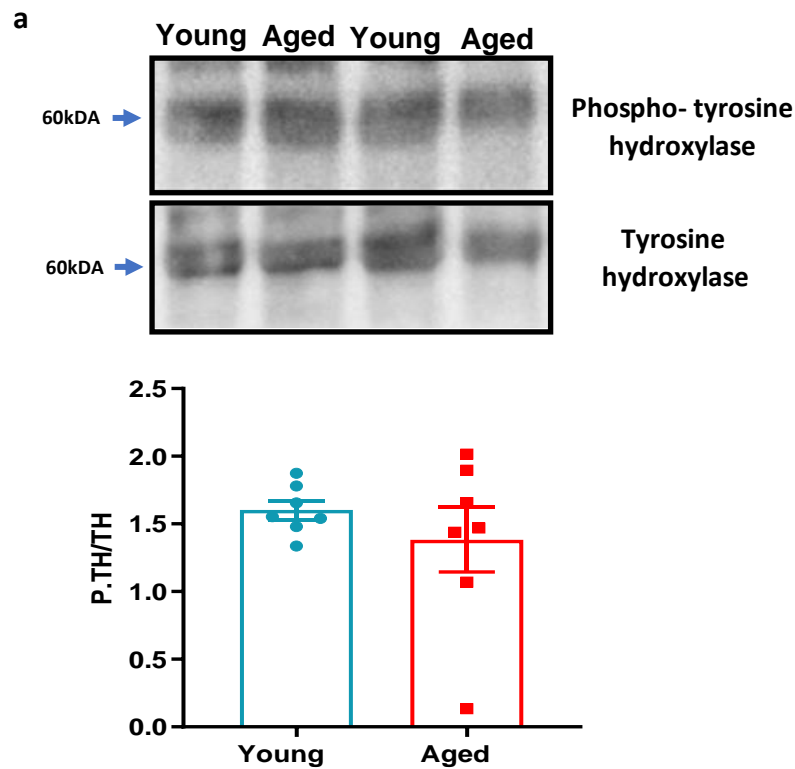

**Supplementary Figure 4: Phospho-tyrosine hydroxylase with ageing. (a)** The representative western blot analysis of phospho-tyrosine hydroxylase in hind paw skin of naïve young and aged mice. The densitometric analysis is normalized to total tyrosine hydroxylase. Results are shown as mean  $\pm$  s.e.m. (n=7) (Two-tailed Student's t-test).

1165  
1166  
1167  
1168  
1169  
1170  
1171  
1172  
1173  
1174  
1175  
1176  
1177  
1178  
1179  
1180  
1181  
1182  
1183  
1184  
1185  
1186  
1187  
1188  
1189  
1190  
1191  
1192  
1193  
1194  
1195

5

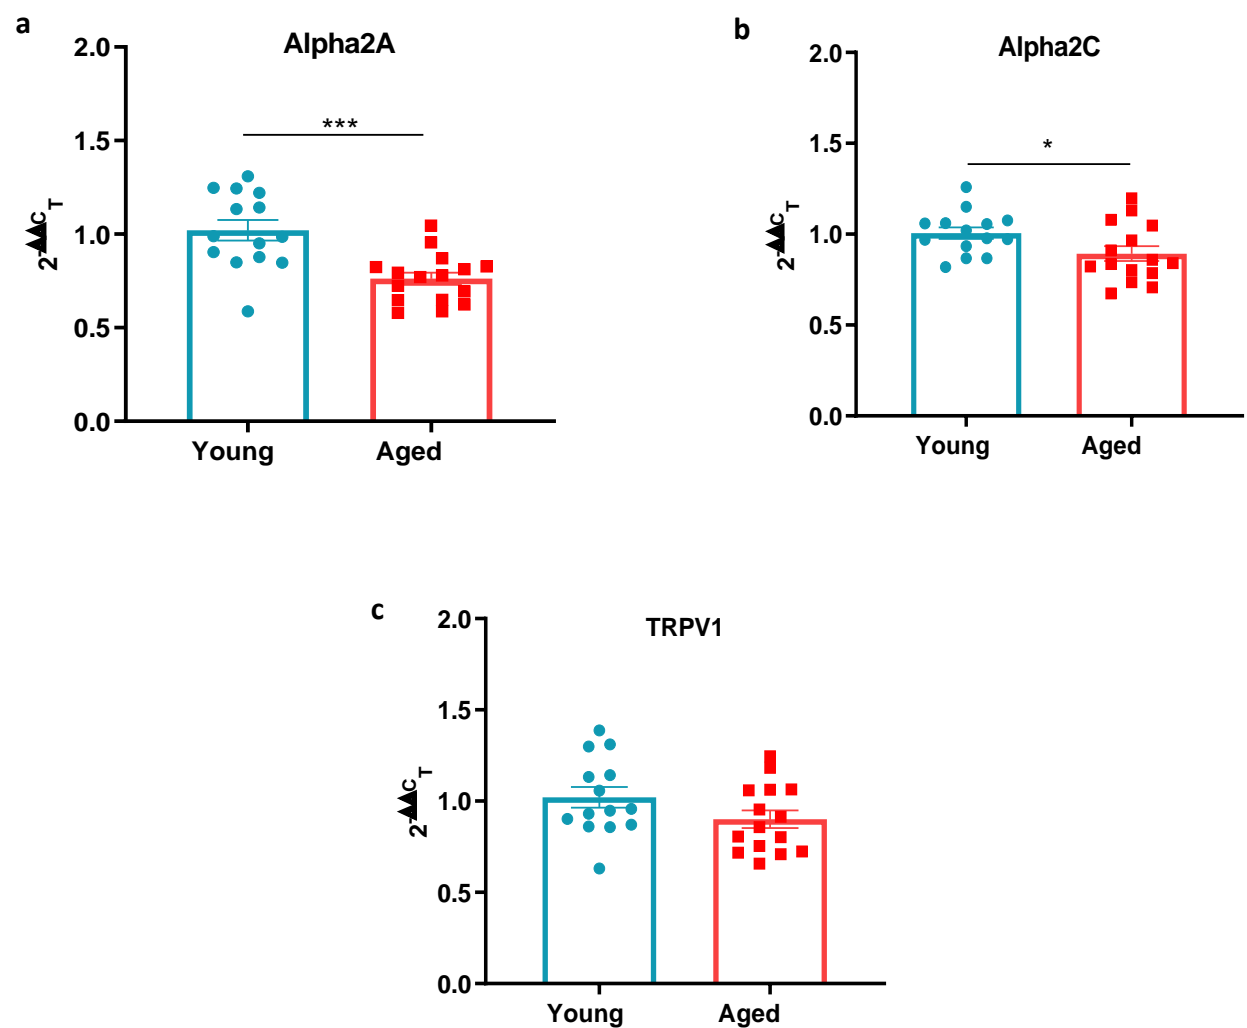

**Supplementary figure 5. Sympathetic-sensory signalling in young and aged mice. (a-c)** RT-PCR CT analysis shows fold change of  $\alpha_{2a}$  adrenoceptor,  $\alpha_{2c}$  adrenoceptor and TRPV1 in young and aged mice normalized to three housekeeping genes in dorsal root ganglia (DRG). Results are shown as mean  $\pm$  s.e.m. (n=14-16) \* $p$ <0.05, \*\*\* $p$ <0.001. (Two-tailed Student's t-test).

1196

1197

6

1198

1199

a

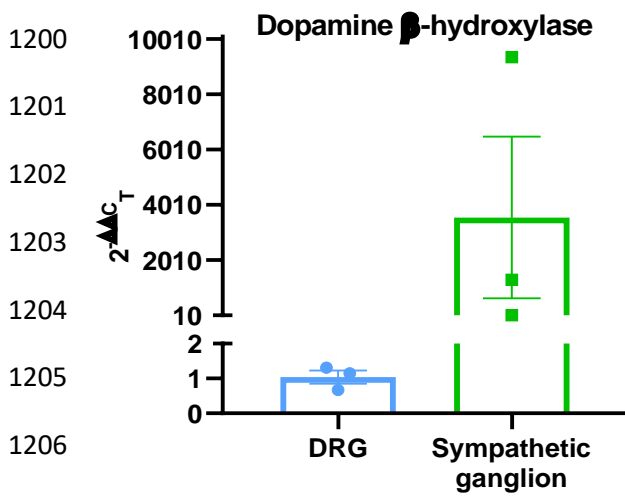

1200

1201

1202

1203

1204

1205

1206

1207

1208

b

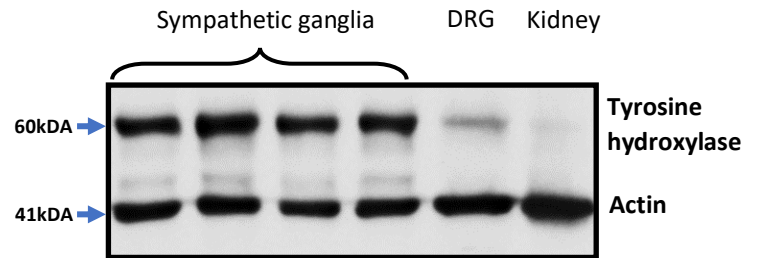

1209 **Supplementary figure 6. Characterisation of sympathetic markers (a)** RT-PCR CT  
1210 analysis shows fold change of the sympathetic nerve marker dopamine β-hydroxylase (Dbh)  
1211 in DRG and sympathetic ganglia normalized to three housekeeping genes. **(b)** The western  
1212 blot analysis of the sympathetic nerve marker tyrosine hydroxylase (TH) in sympathetic  
1213 ganglia, DRG and kidney. Results are shown as mean ± s.e.m. (n=3).

1214

1215

1216

1217

1218

1219

1220

1221

1222

1223

1224

1225

1226

1227

1228 **Supplementary Table 1.** List of primer sequences

1229

| Gene Name     | RefSeq ID      | Forward Sequence          | Reverse Sequence        | Amplicon Size (bp) |
|---------------|----------------|---------------------------|-------------------------|--------------------|
| <b>TRPA1</b>  | NM_001348288.1 | GAGGATTGCTATGCAGGTGGA     | TCCACTTTGCGCAAGTACCA    | 75                 |
| <b>TRPV1</b>  | NM_001001445.2 | CAACAAGAAGGGGCTTACACC     | TCTGGAGAATGTAGCCAAGAC   | 77                 |
| <b>TRPM8</b>  | NM_134252.4    | TTGTATTCCGGCTCCACTCTTC    | AGTTCCTGCTGACGGTGAAAA   | 120                |
| $\alpha_{2A}$ | NM_007417.5    | TCATCTCCTCGTCCATCGGT      | ACGCTTGGCGATCTGGTAAA    | 86                 |
| $\alpha_{2c}$ | NM_007418.3    | ACAAGCGCACTCTCCAATCA      | AGTCTCCACTCACTCGGTT     | 106                |
| <b>p16</b>    | NM_001040654.1 | CCATCTGGAGCAGCATGGAGT     | TCATCATCACCTGAATCGGGGTA | 150                |
| <b>p21</b>    | NM_001111099.2 | CAGCAGAATAAAAAGGTGCCACA   | CACGGGACCGAAGAGACAAC    | 100                |
| <b>GAPDH</b>  | NM_001289726.1 | GGTCATCCCAGAGCTGAACG      | TTGCTGTTGAAGTCGCAGGA    | 294                |
| <b>B2M</b>    | NM_009735.3    | GCCTGTATGCTATCCAGAAAACCCC | TGTGAGGCGGGTGGAACTGTG   | 114                |
| <b>Act</b>    | NM_007393.5    | CACTGTGAGTCGCGTCCA        | GTCATCCATGGCGAACTGGTG   | 90                 |
| <b>HPRT</b>   | NM_013556.2    | TCCTCCTCAGACCGCTTTT       | CCTGGTTCATCATCGCTAATC   | 90                 |
| <b>Dbh</b>    | NM_138942.3    | TACTTTGCGGATGCCTGGAG      | ATCTCGAGTCCTCTGTGCCT    | 93                 |
| <b>TH</b>     | NM_009377.2    | AGGGCCTCTATGCTACCCAT      | AAGCCAGTCCGTTCTTCAA     | 136                |

1230

1231 Act- beta actin

HPRT- hypoxanthine guanine phosphoribosyl transferase

B2M -  $\beta$ 2 microglobulin

GAPDH - Glyceraldehyde 3-phosphate dehydrogenase

Dbh – dopamine  $\beta$ -hydroxylase

TH – tyrosine hydroxylase

$\alpha_{2a}$  – alpha2a adrenoceptor

$\alpha_{2c}$  – alpha2c adrenoceptor
